# Supplementary material for: Intramolecular [3 + 2] nitrone cycloaddition reaction: highly regio and diastereoselective synthesis of bicyclo[3.2.1]octane scaffolds
Source: Royal Society of Chemistry journal article supplement (doi:10.1039/d0ob01960g), 2020-01-01

# **Intramolecular [3+2] Nitronc Cycloaddition Reaction: Highly Regio and Diastereoselective Synthesis of Bicyclo[3.2.1]octane Scaffolds**

**Manickam Bakthadoss,\* Mohammad Mushaf**

*\*Department of Chemistry, Pondicherry University, Pondicherry-605 014, India*

*E-mail: bhakthadoss@yahoo.com*

## **Supplementary Information**

|                                                                                                |      |
|------------------------------------------------------------------------------------------------|------|
| 1. <sup>1</sup> H and <sup>13</sup> C NMR spectra for the compounds (3a-u, 5a-b and 4a-b)..... | 2-26 |
|------------------------------------------------------------------------------------------------|------|

$^1\text{H}$  and  $^{13}\text{C}$  NMR spectrum of compound **3a**

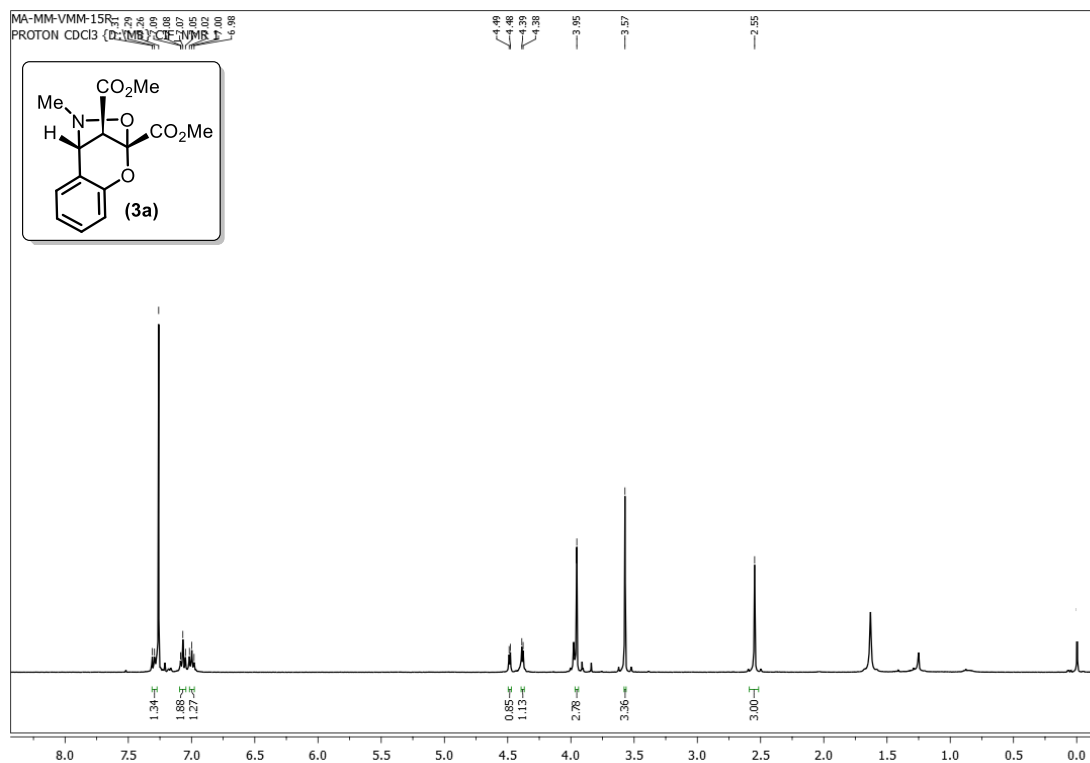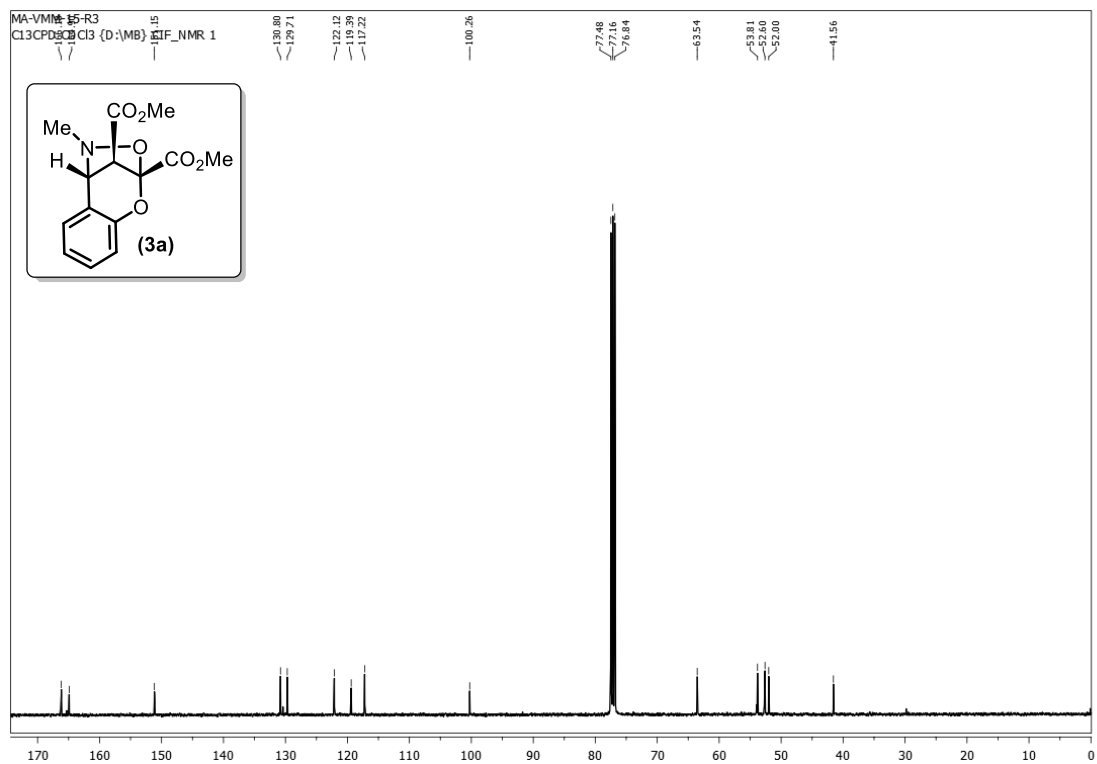

$^1\text{H}$  and  $^{13}\text{C}$  NMR spectrum of compound **3b**

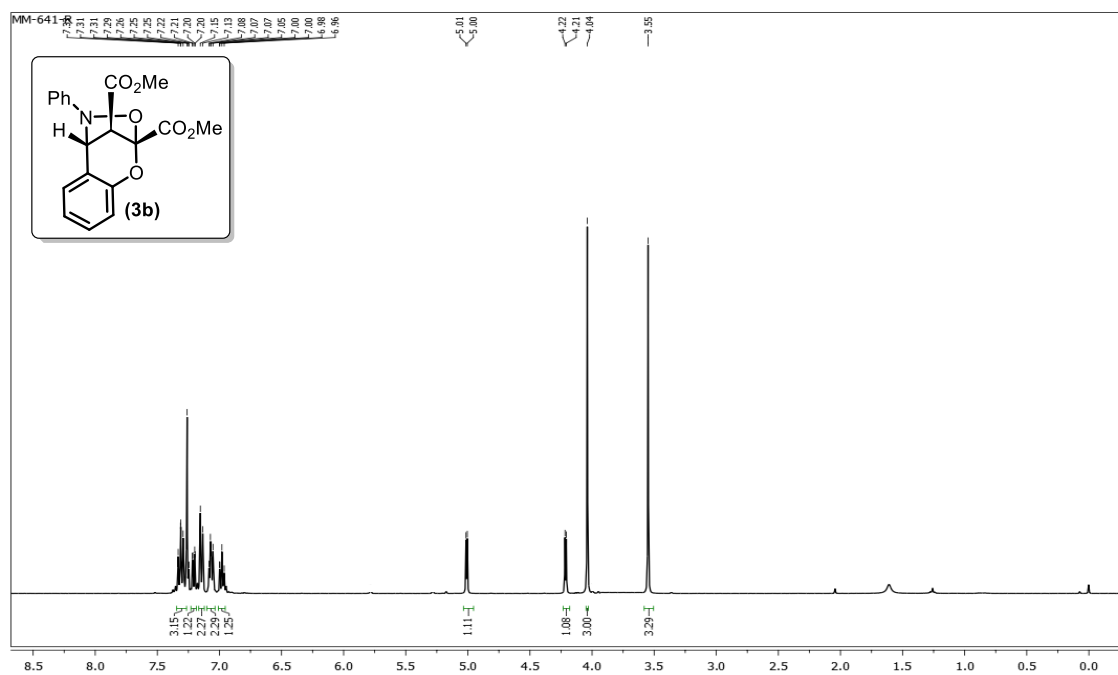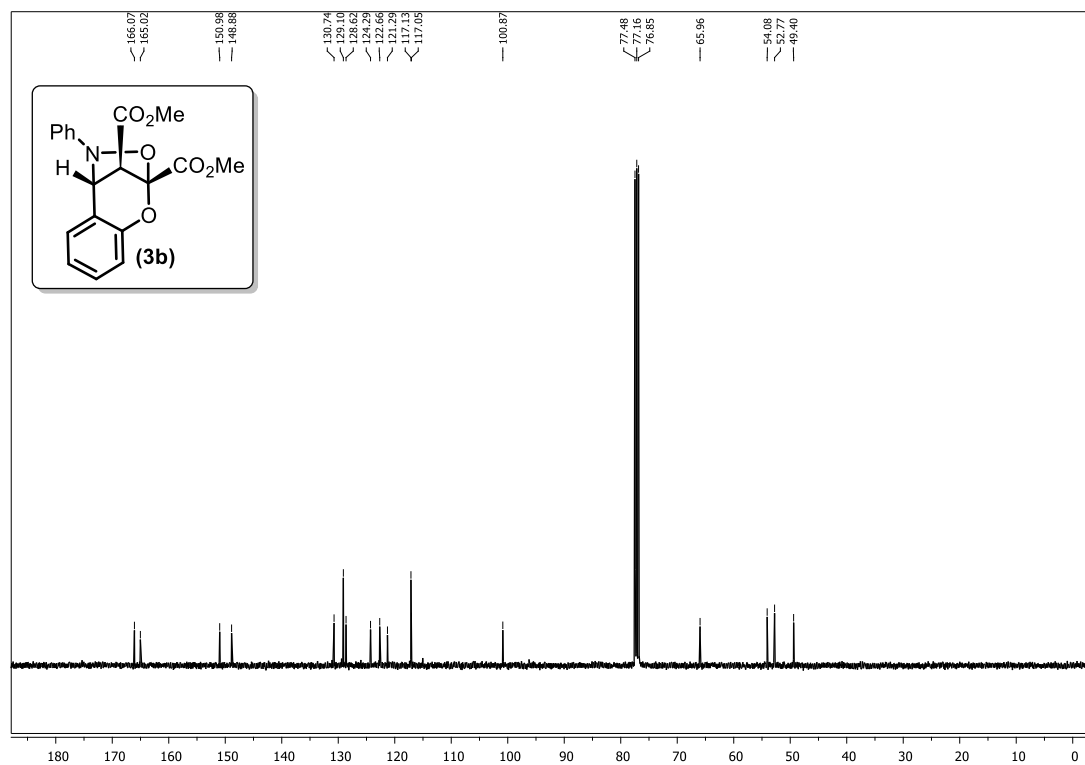

$^1\text{H}$  and  $^{13}\text{C}$  NMR spectrum of compound **3c**

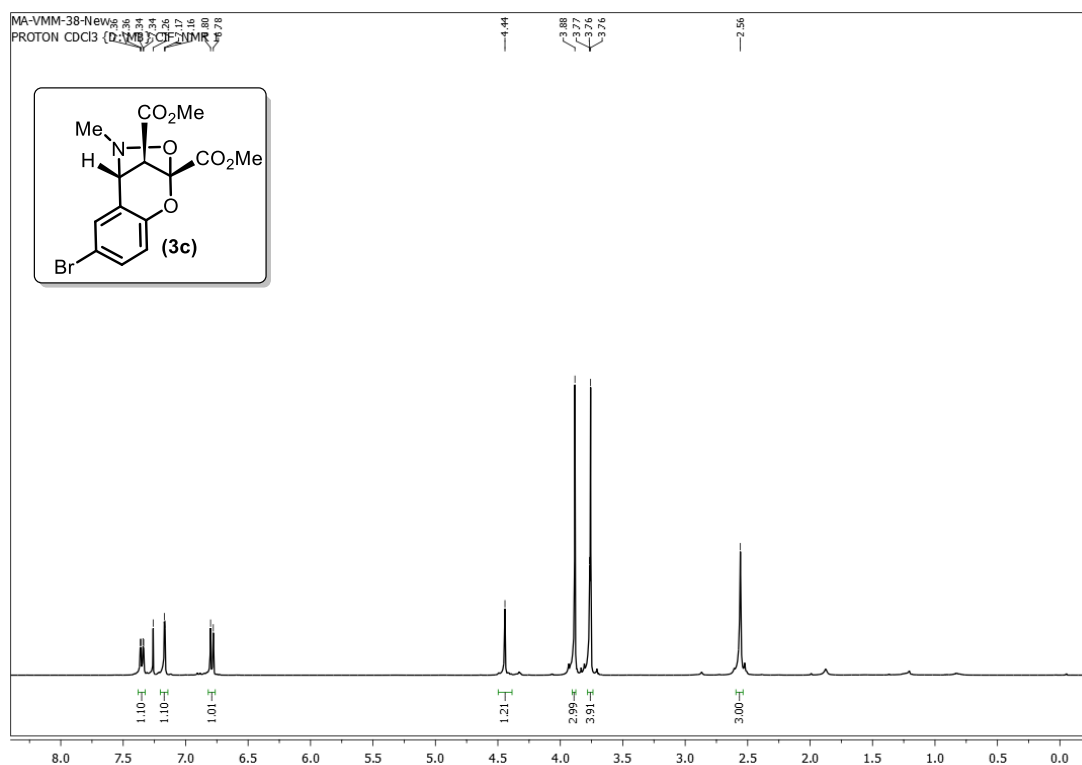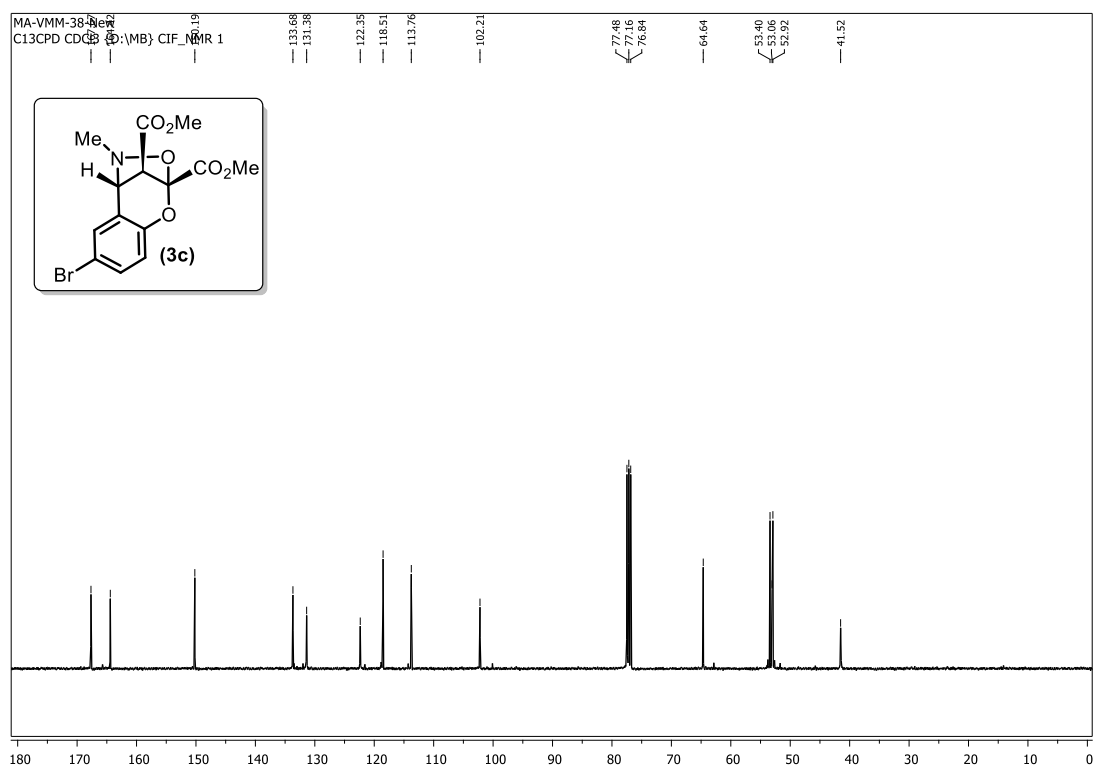

$^1\text{H}$  and  $^{13}\text{C}$  NMR spectrum of compound **3d**

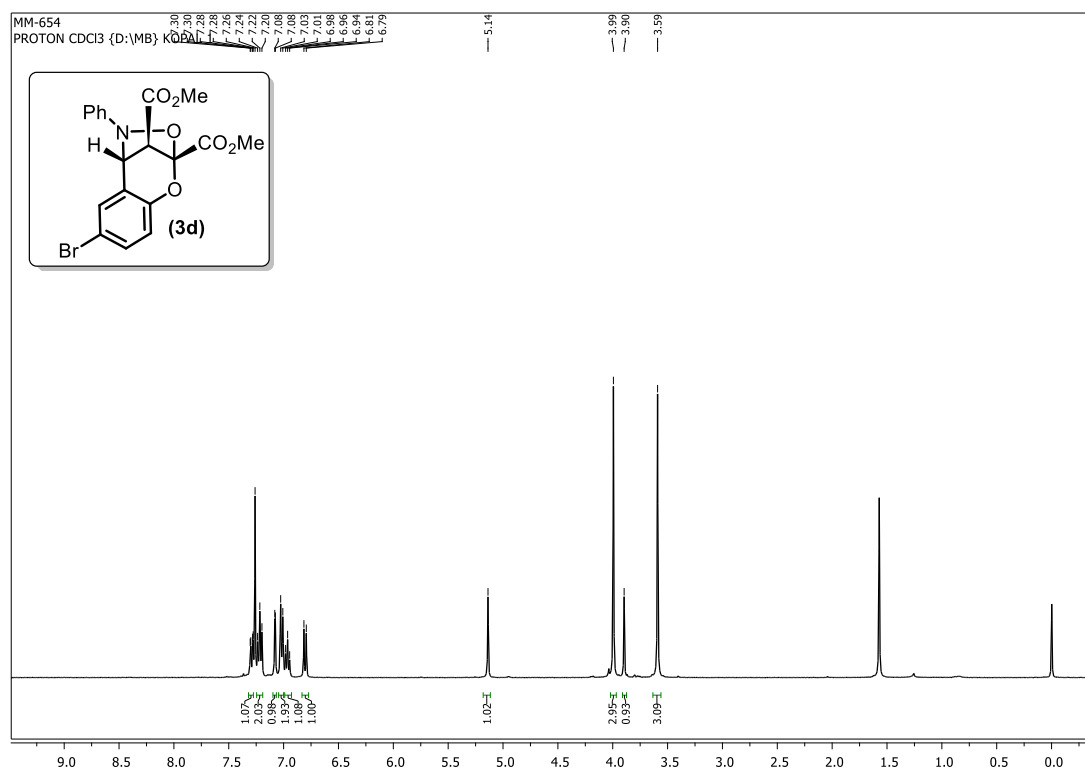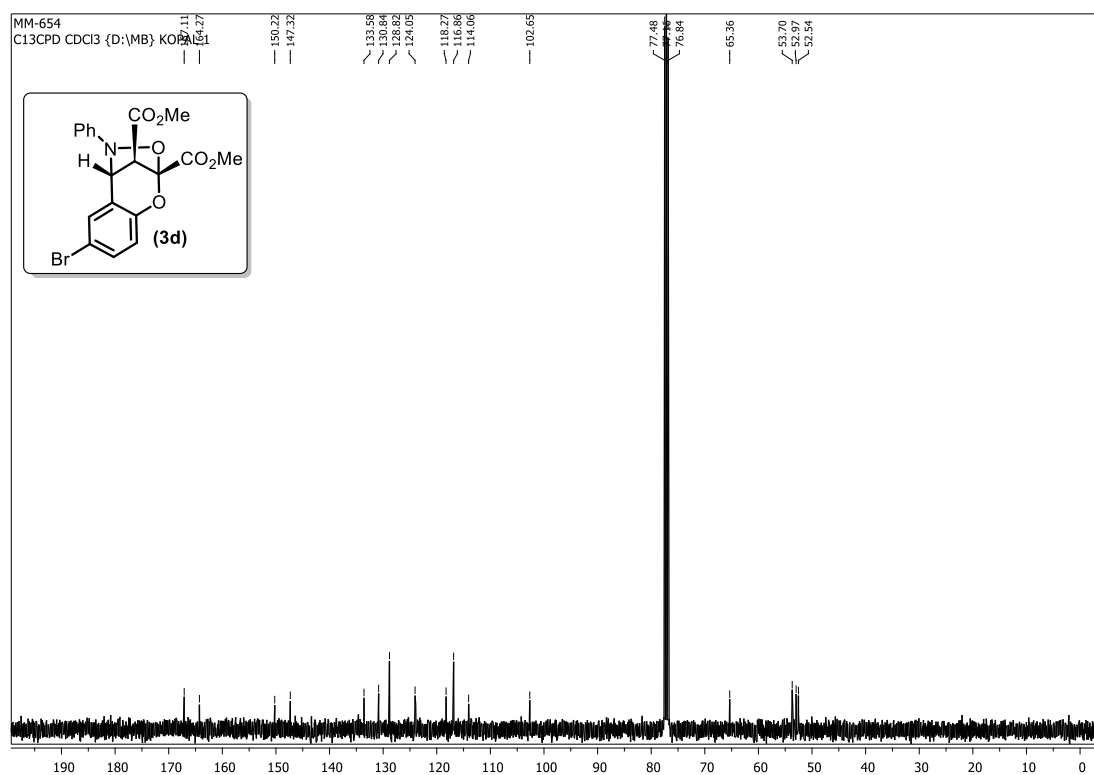

$^1\text{H}$  and  $^{13}\text{C}$  NMR spectrum of compound **3e**

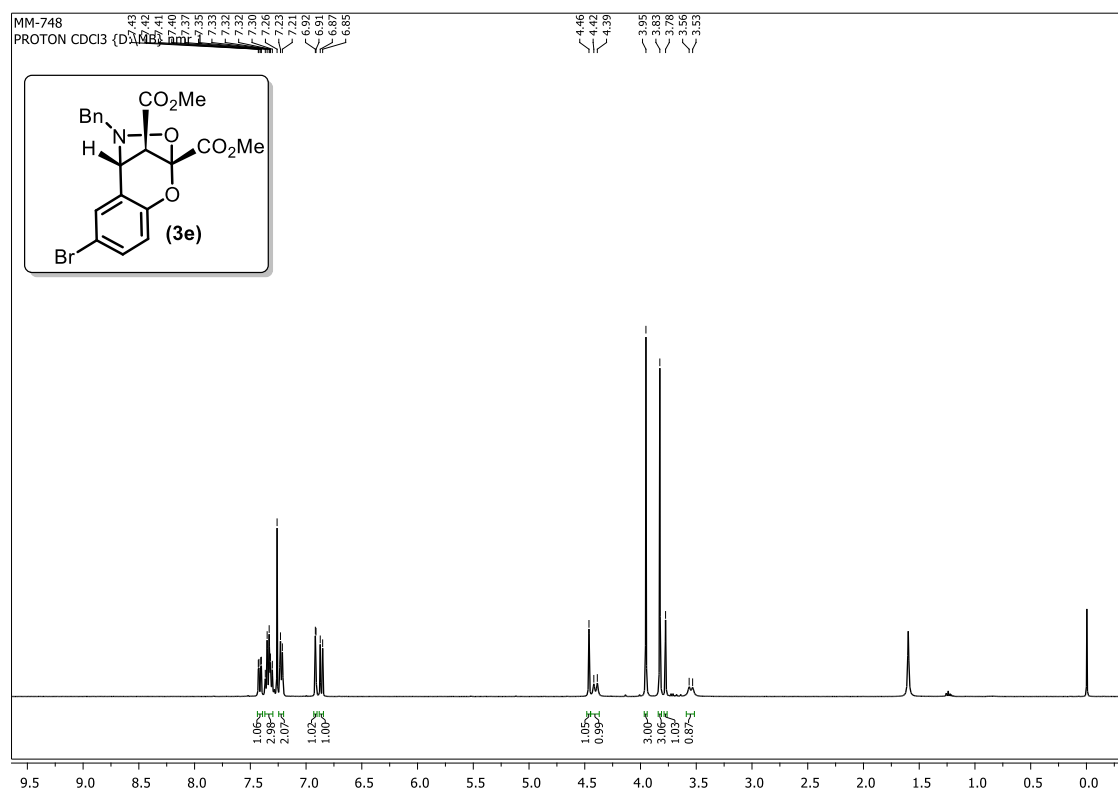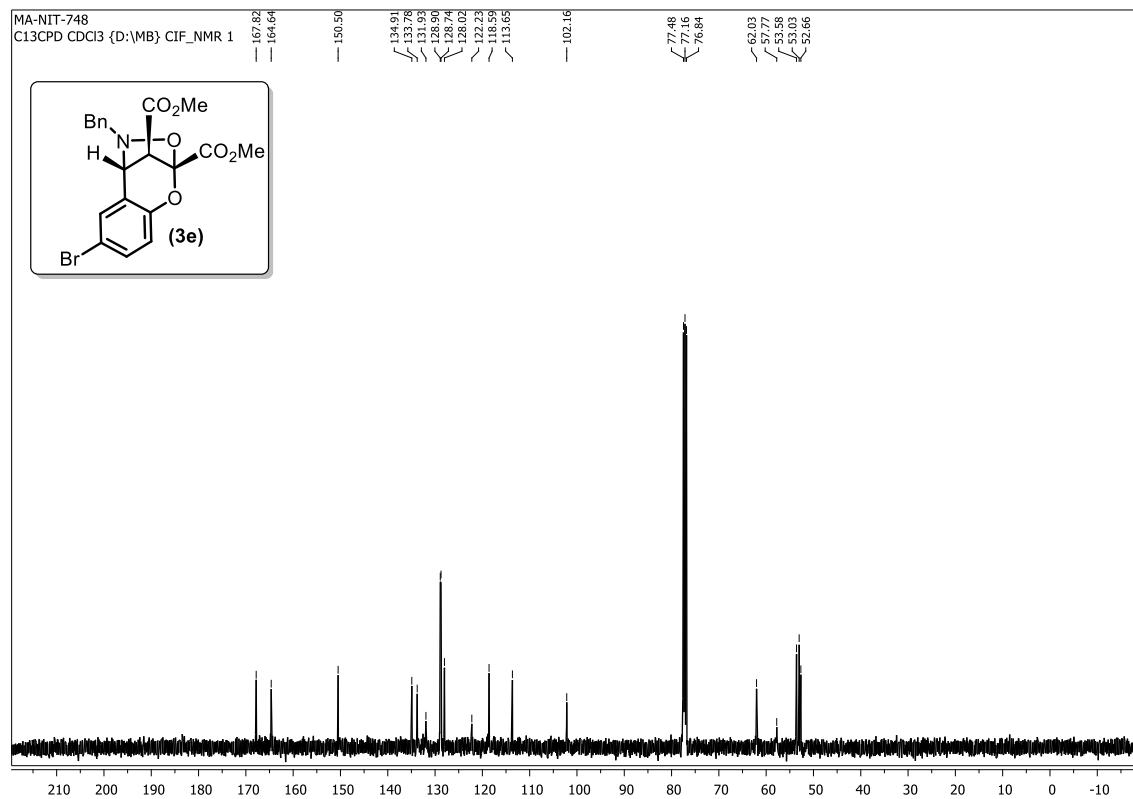

$^1\text{H}$  and  $^{13}\text{C}$  NMR spectrum of compound **3f**

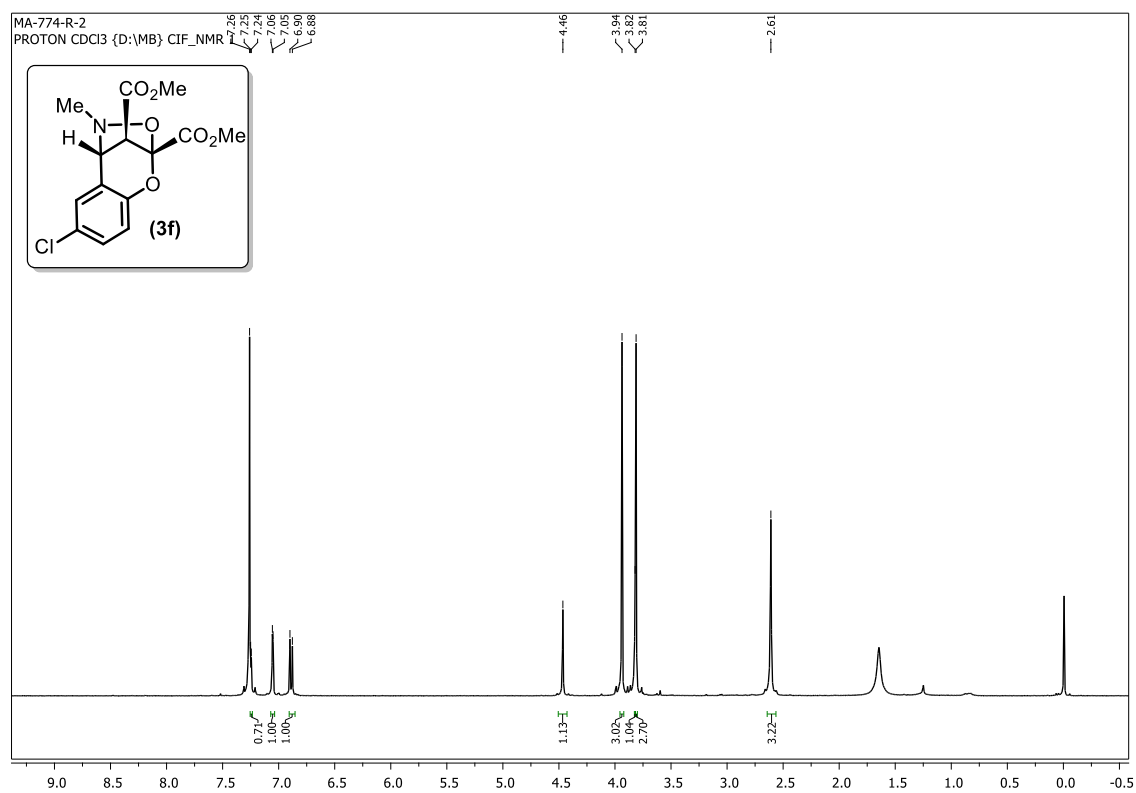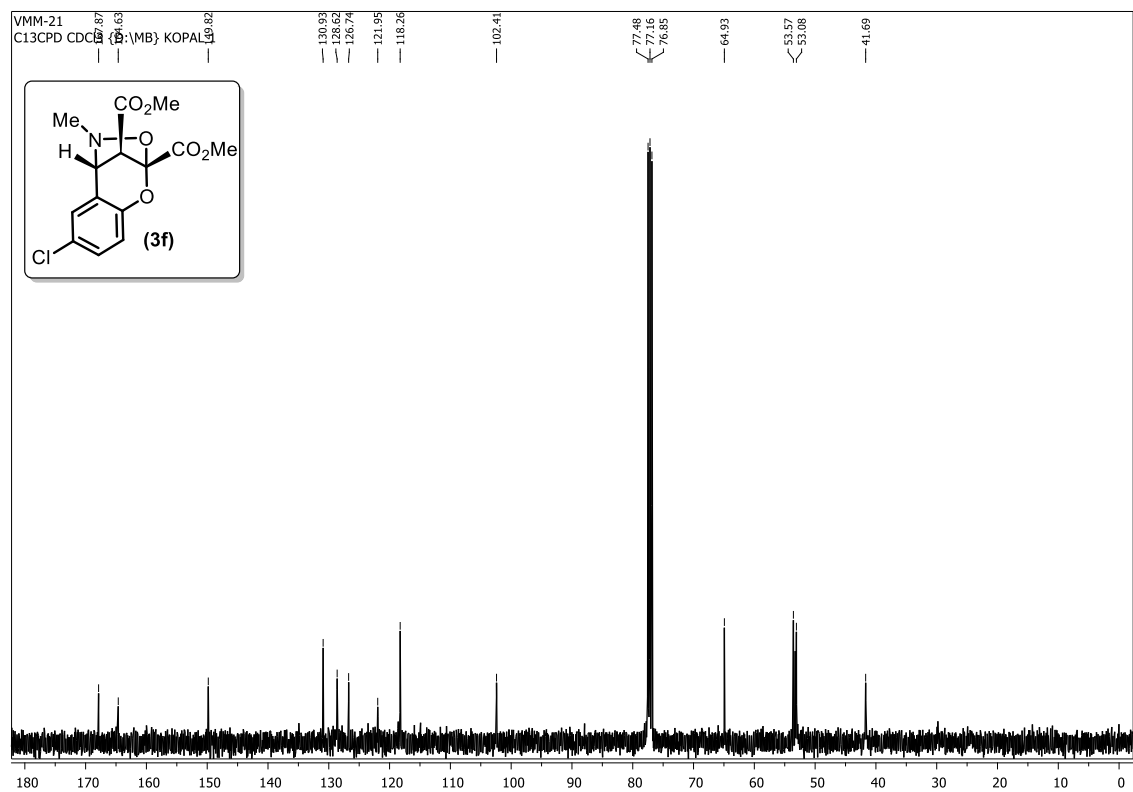

$^1\text{H}$  and  $^{13}\text{C}$  NMR spectrum of compound **3g**

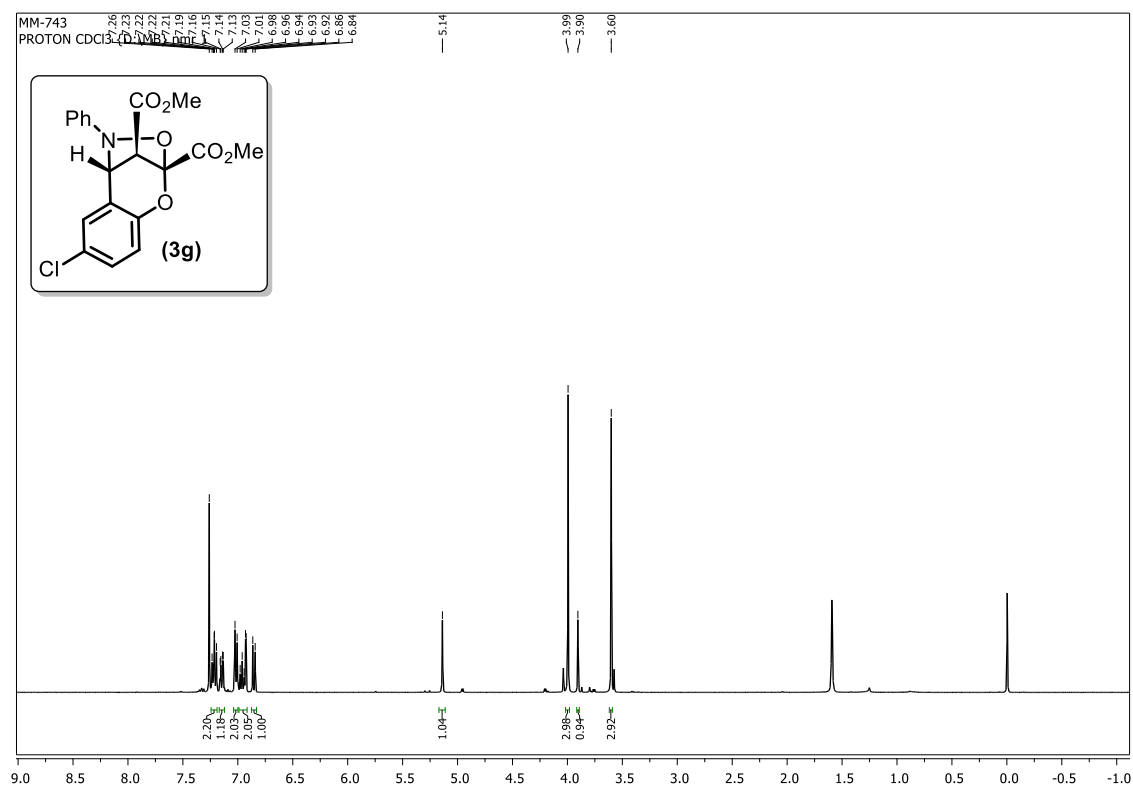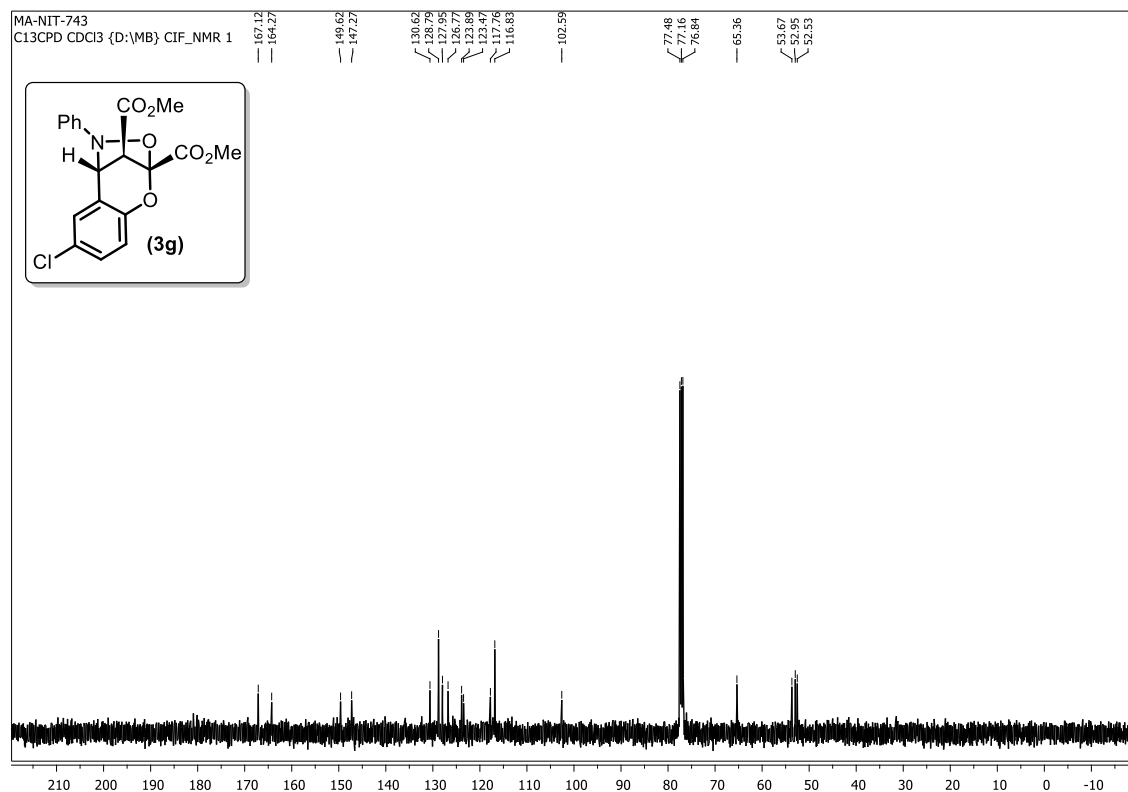



# <sup>1</sup>H and <sup>13</sup>C NMR spectrum of compound **3h**

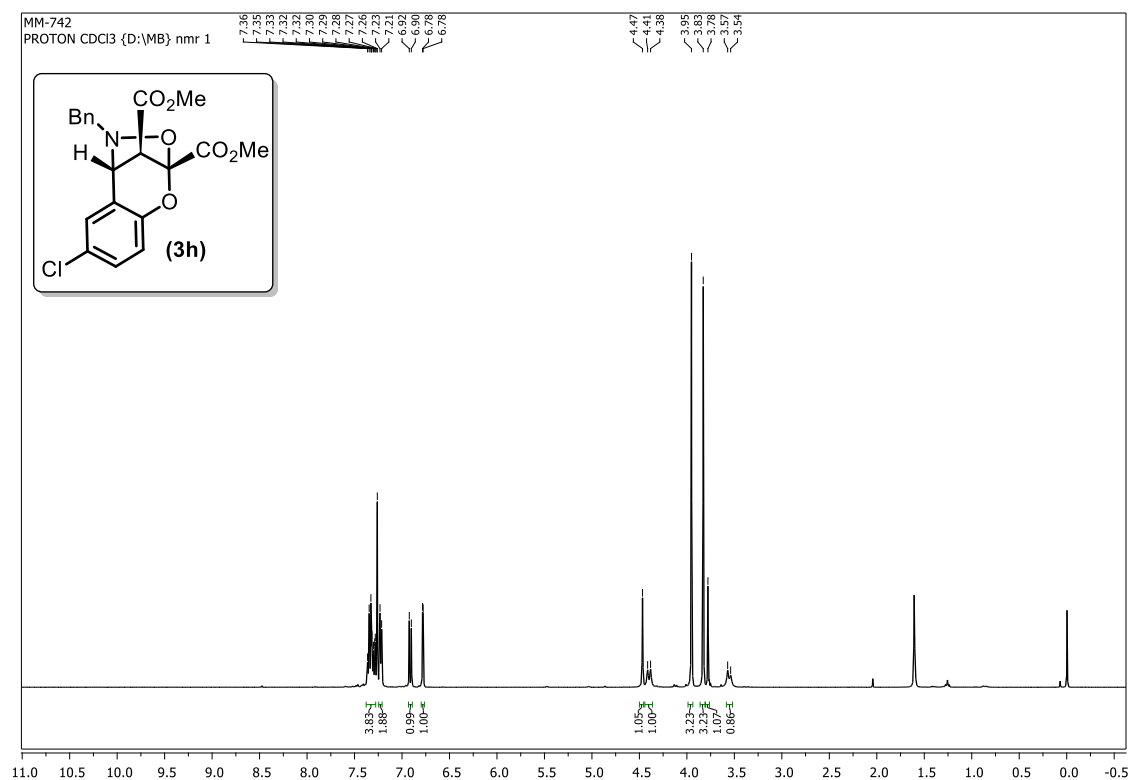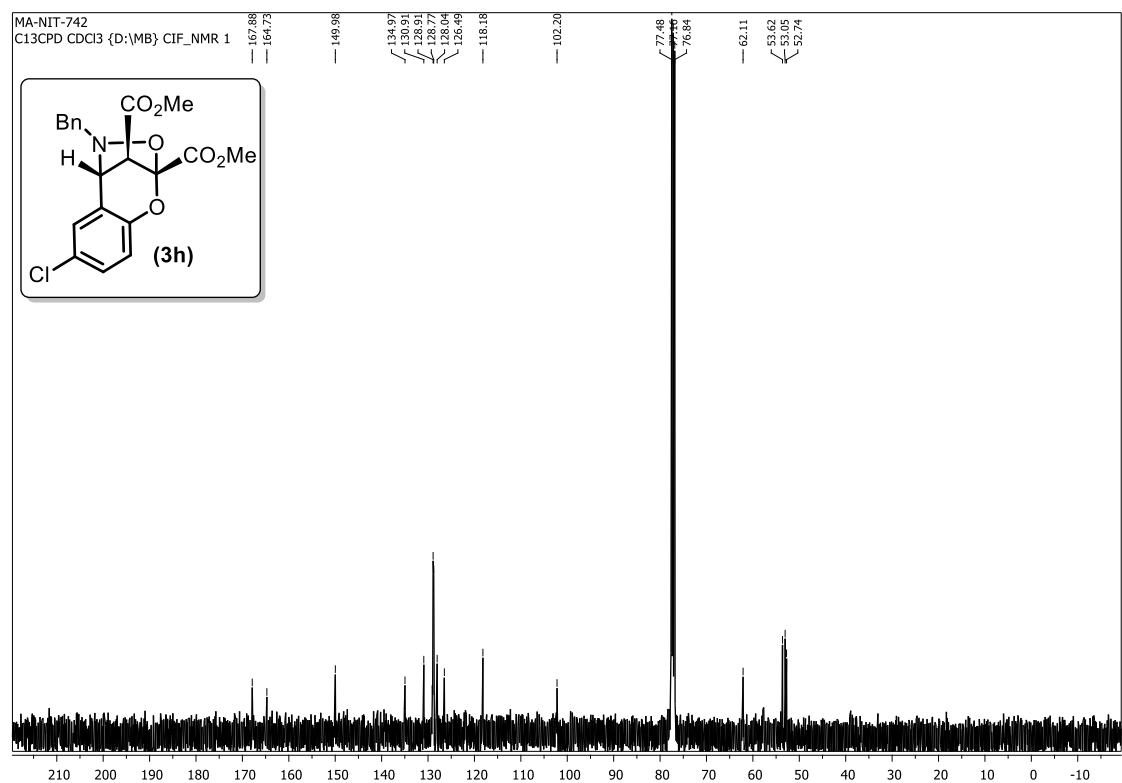

$^1\text{H}$  and  $^{13}\text{C}$  NMR spectrum of compound **3i**

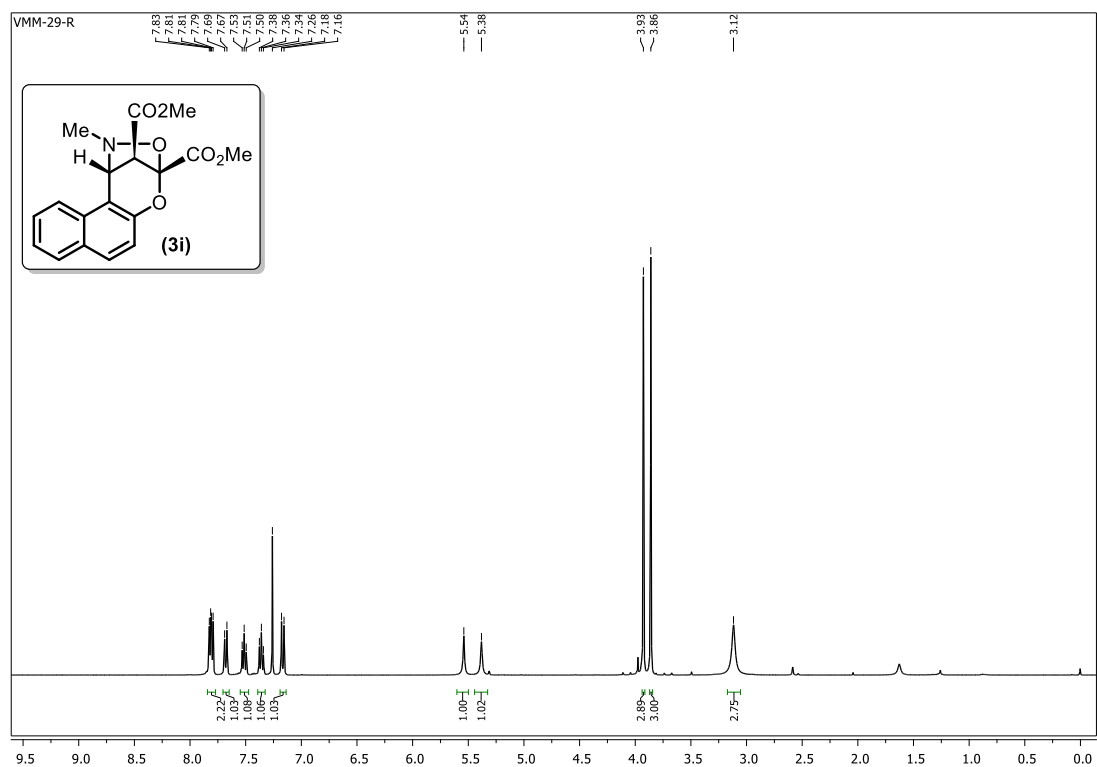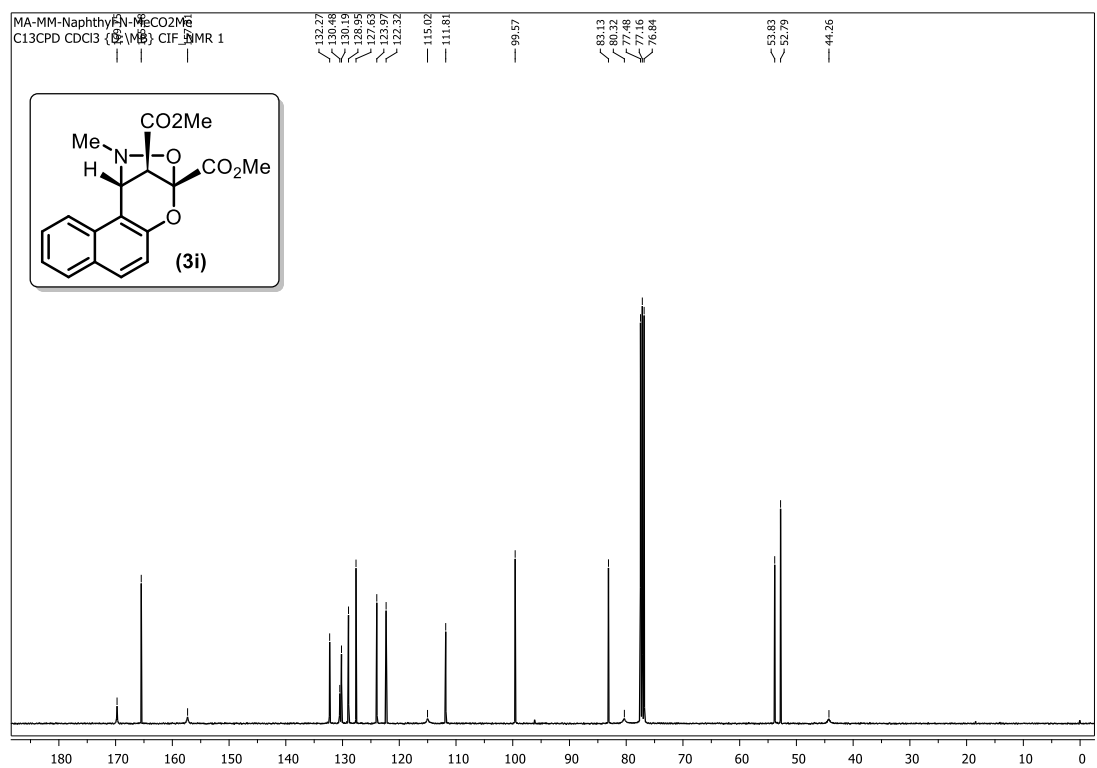

$^1\text{H}$  and  $^{13}\text{C}$  NMR spectrum of compound **3j**

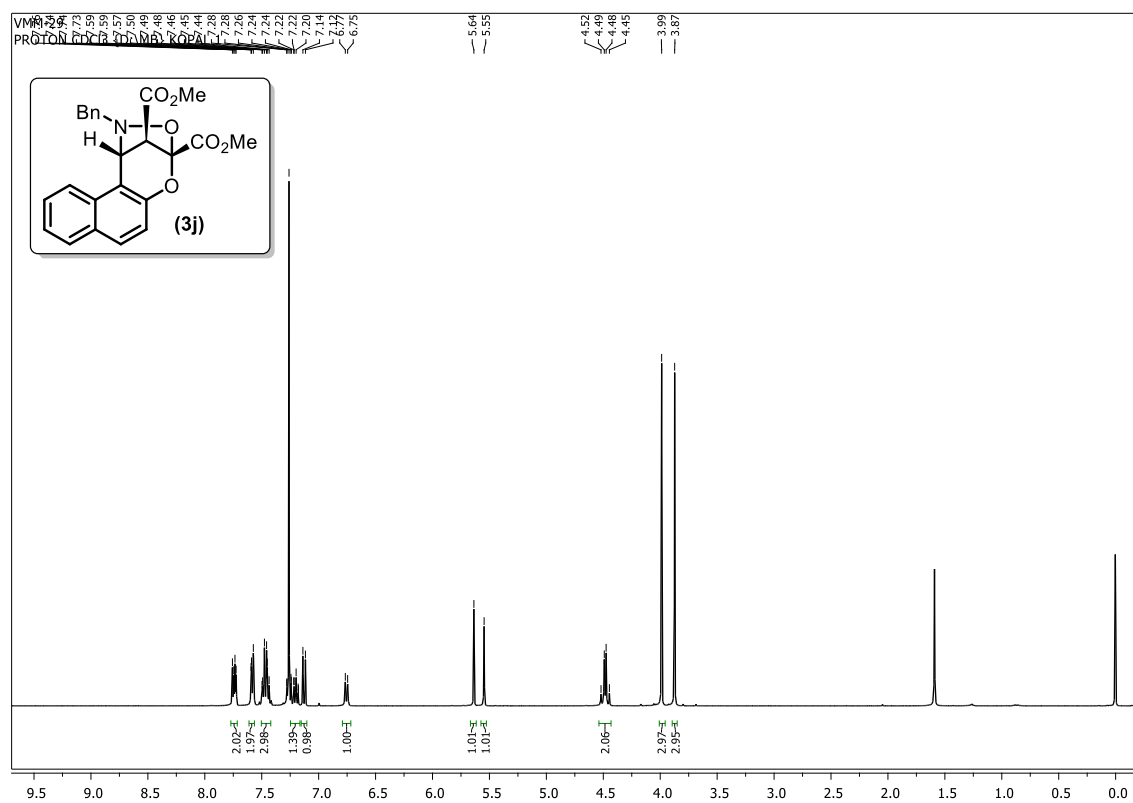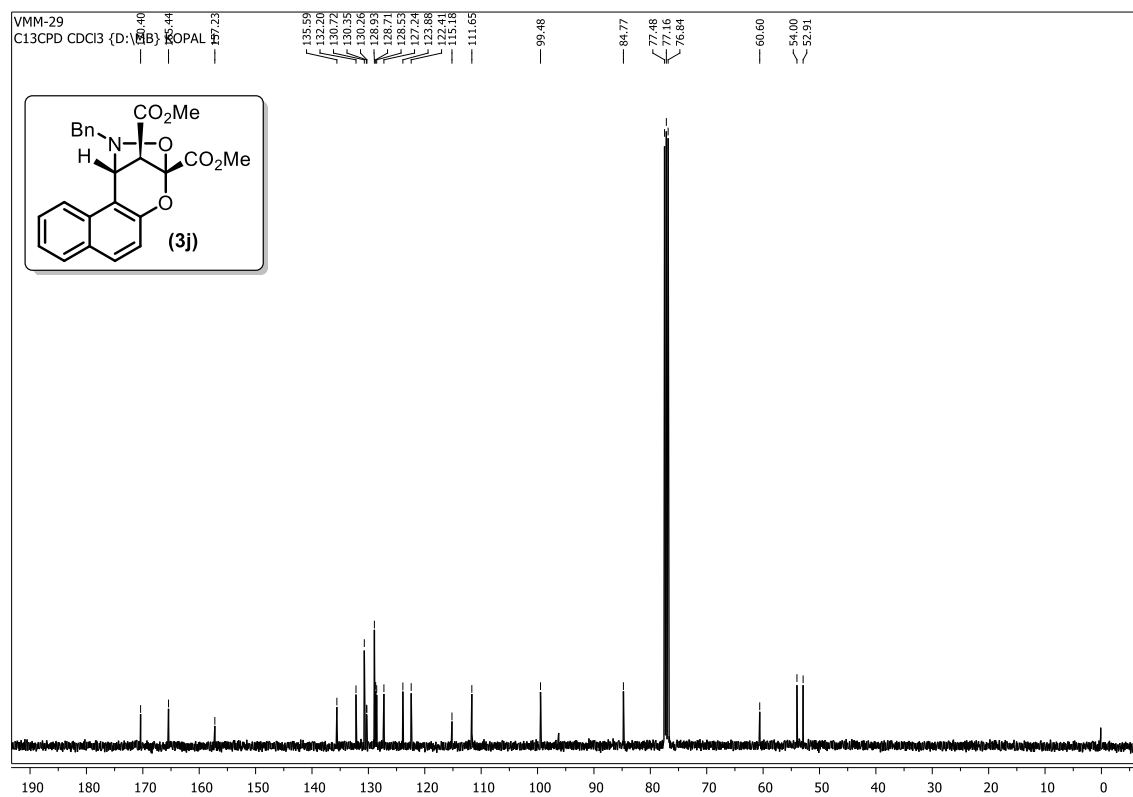

$^1\text{H}$  and  $^{13}\text{C}$  NMR spectrum of compound **3k**

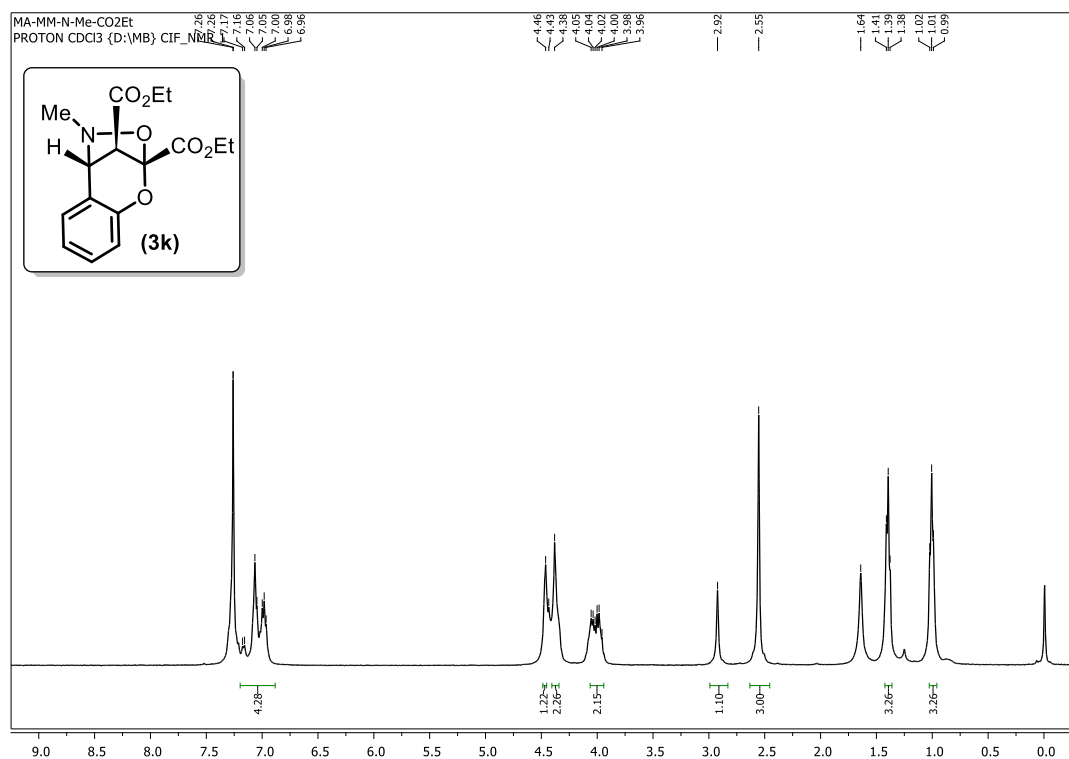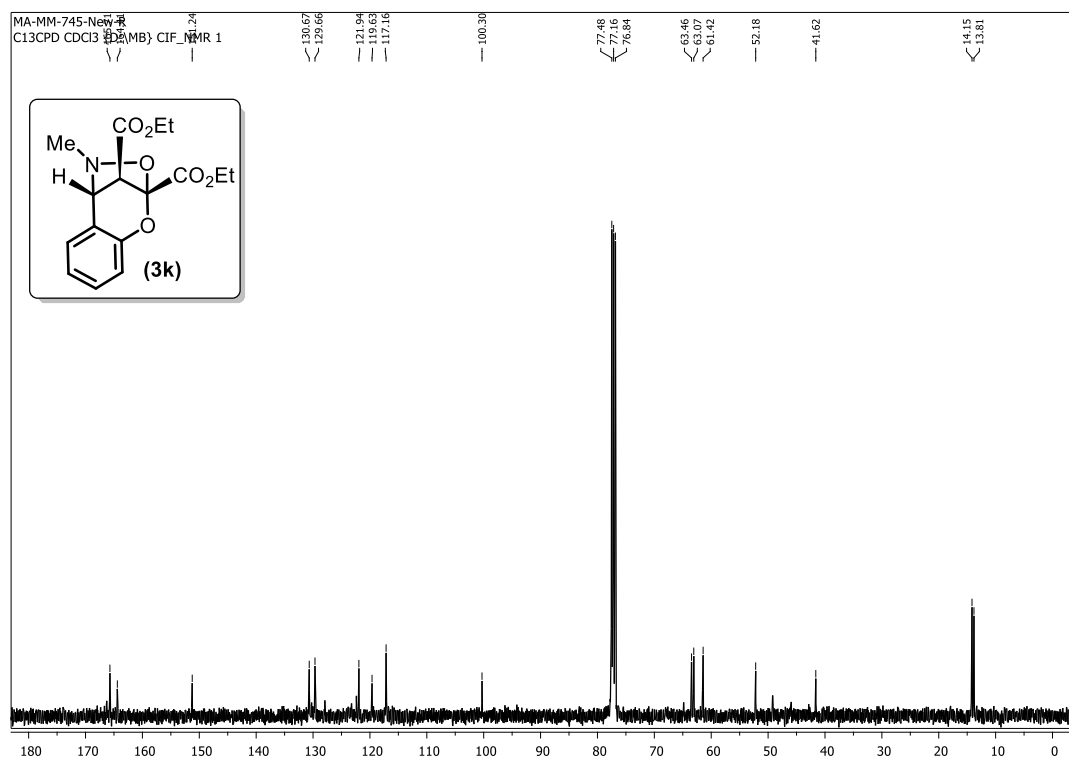

$^1\text{H}$  and  $^{13}\text{C}$  NMR spectrum of compound **3I**

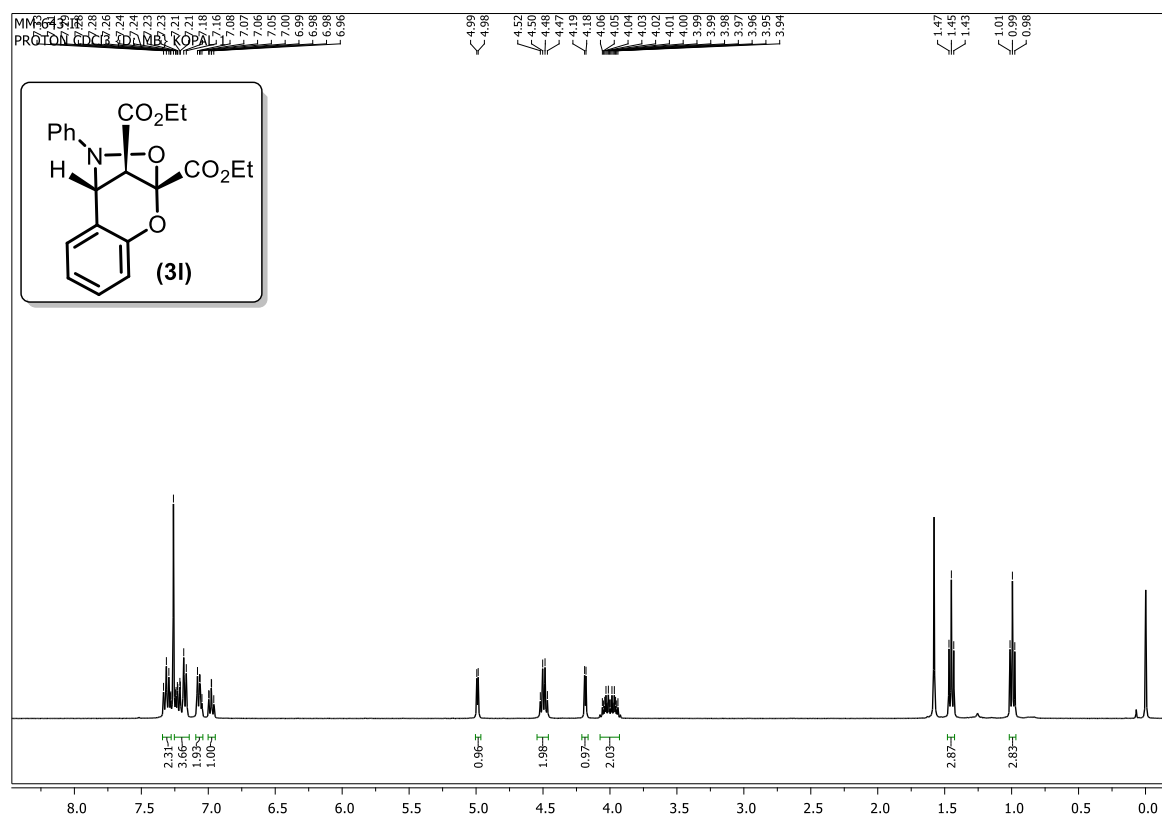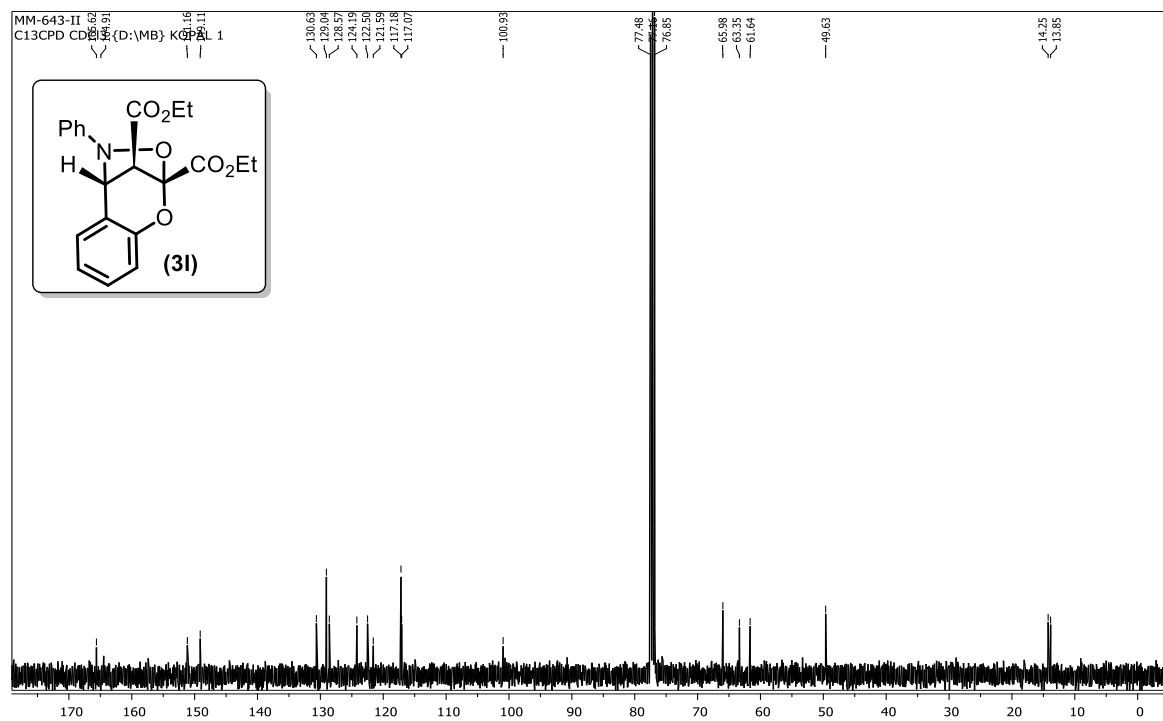

# <sup>1</sup>H and <sup>13</sup>C NMR spectrum of compound **3m**

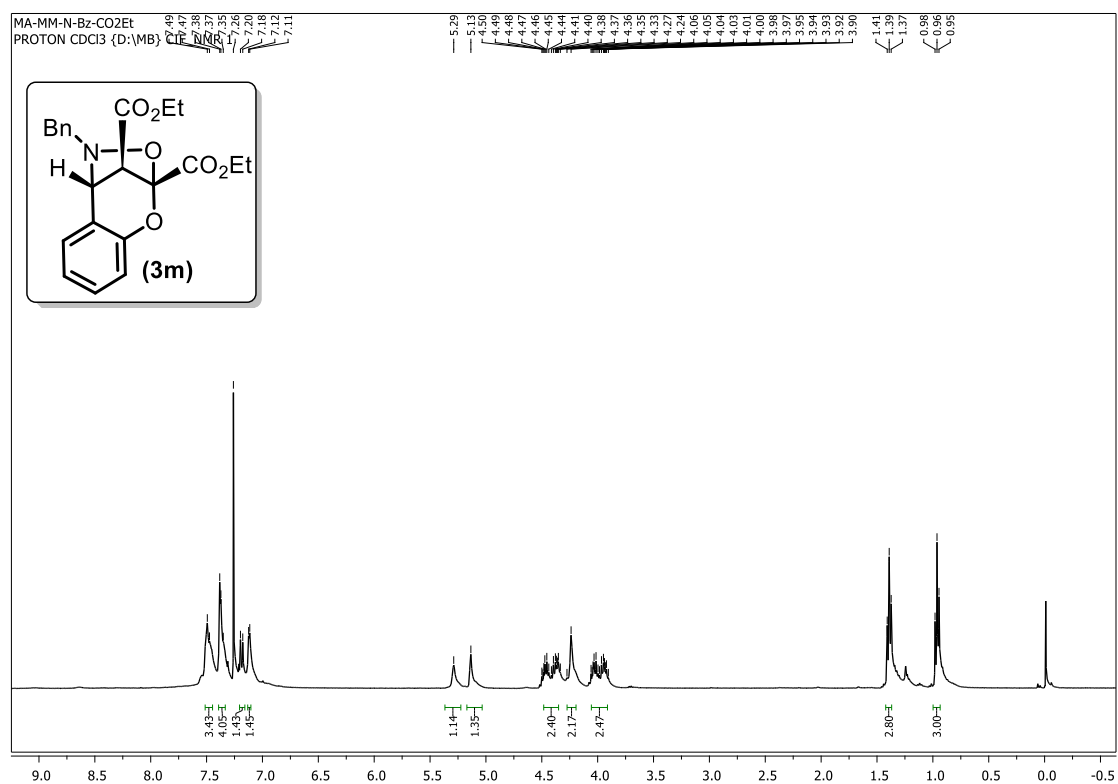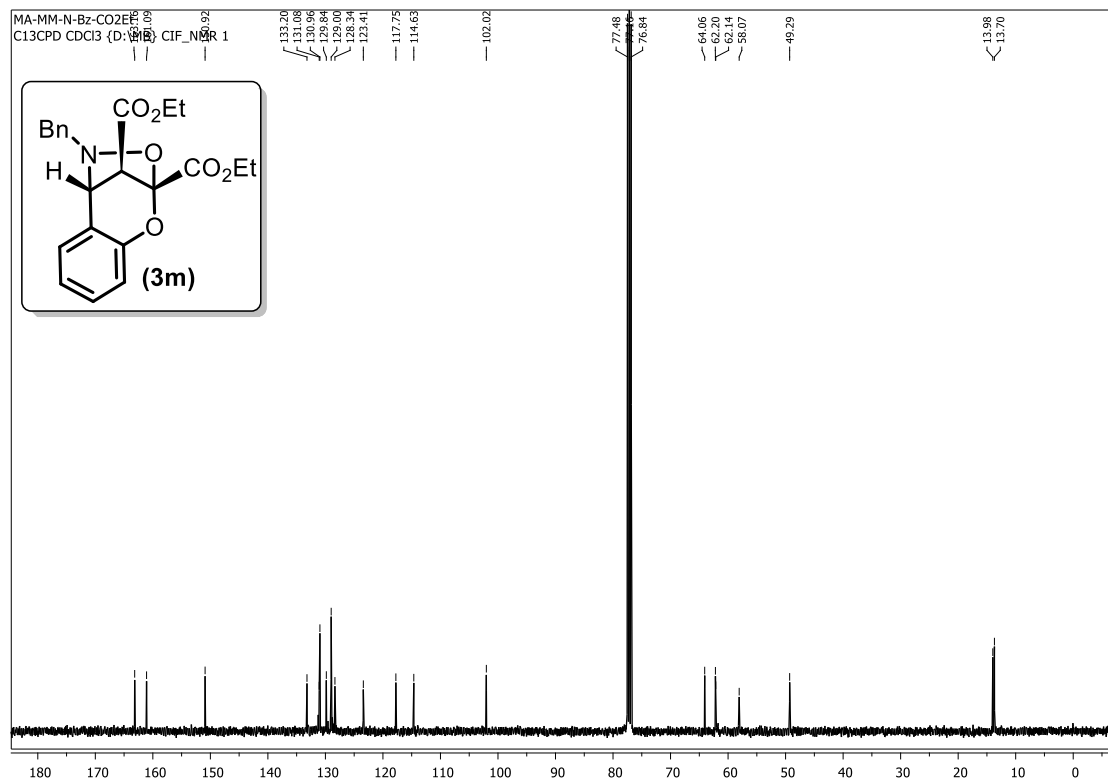

# <sup>1</sup>H and <sup>13</sup>C NMR spectrum of compound **3n**

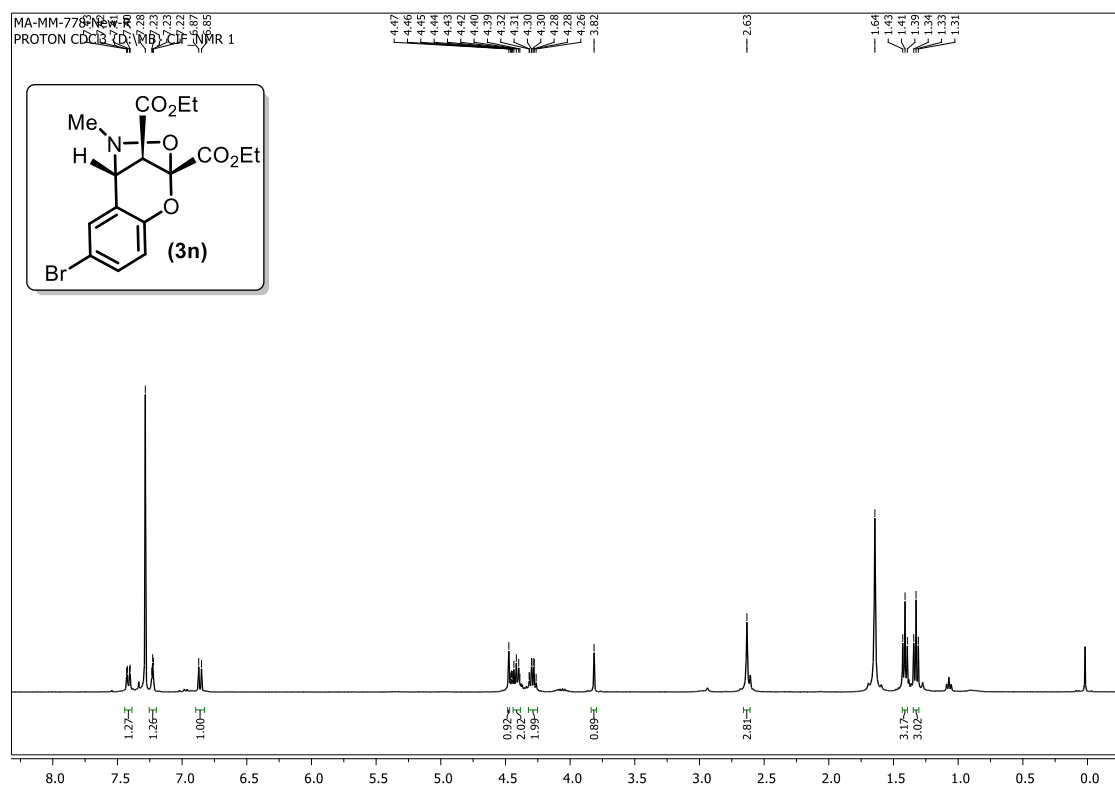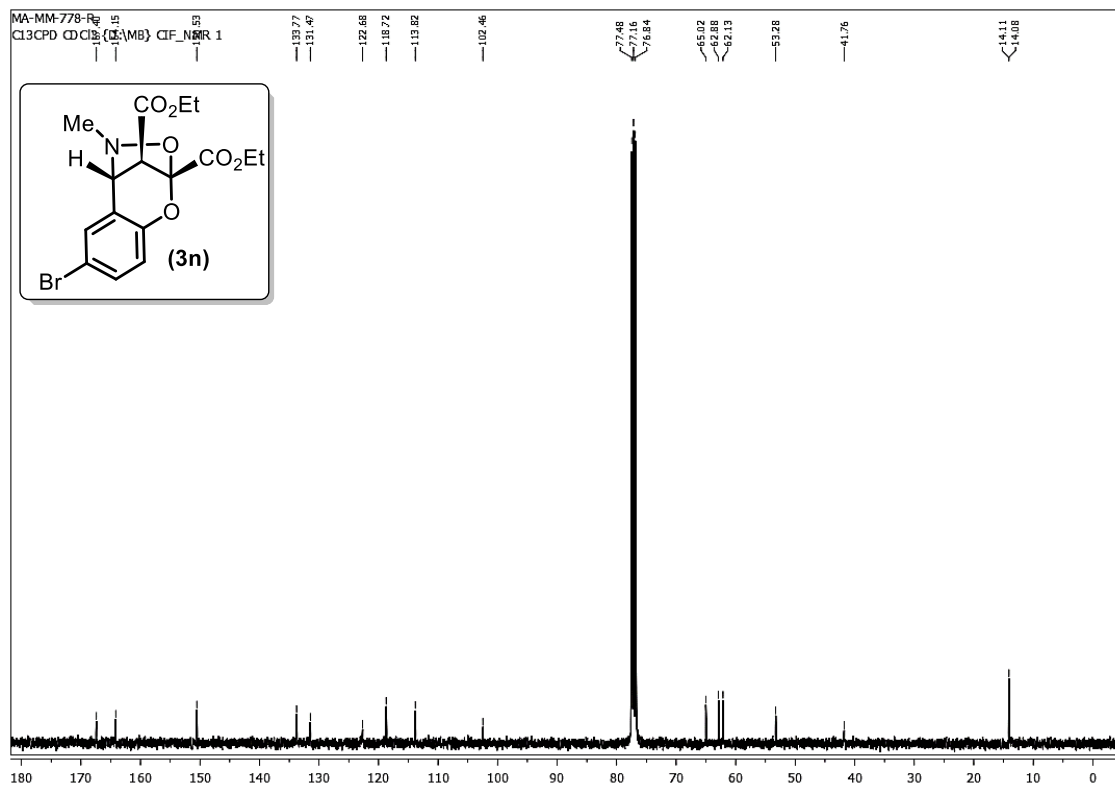

$^1\text{H}$  and  $^{13}\text{C}$  NMR spectrum of compound **3o**

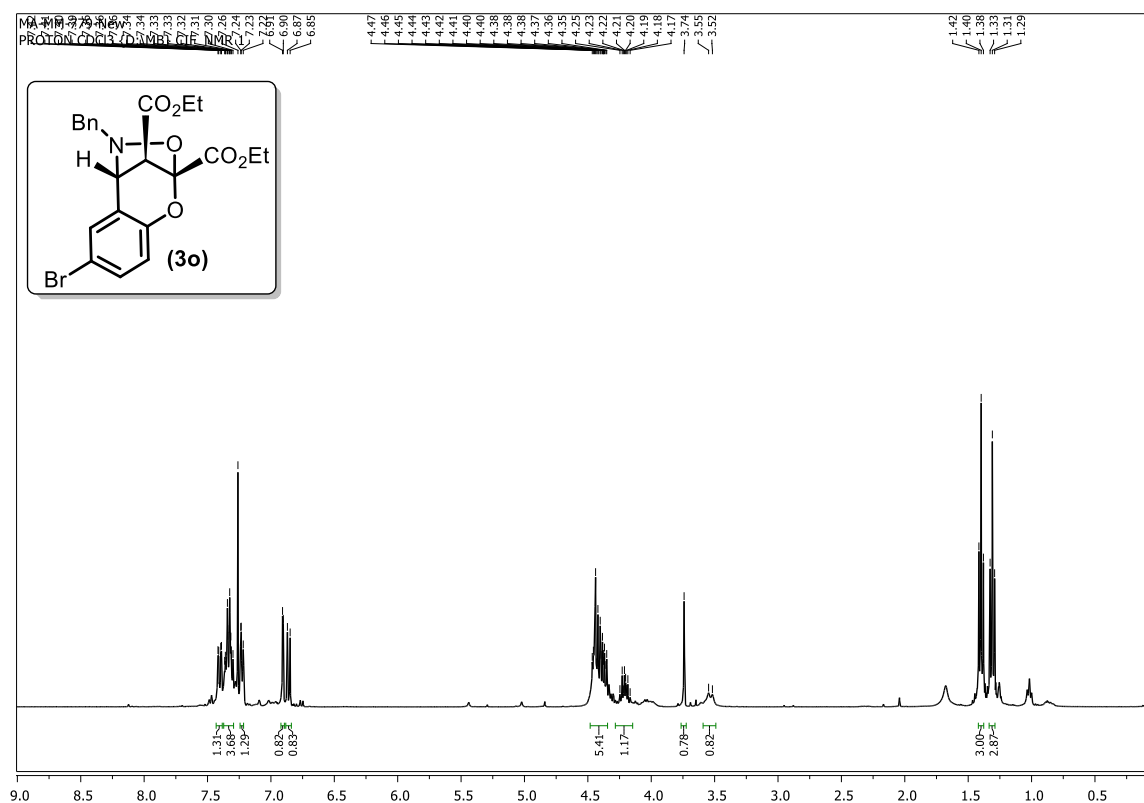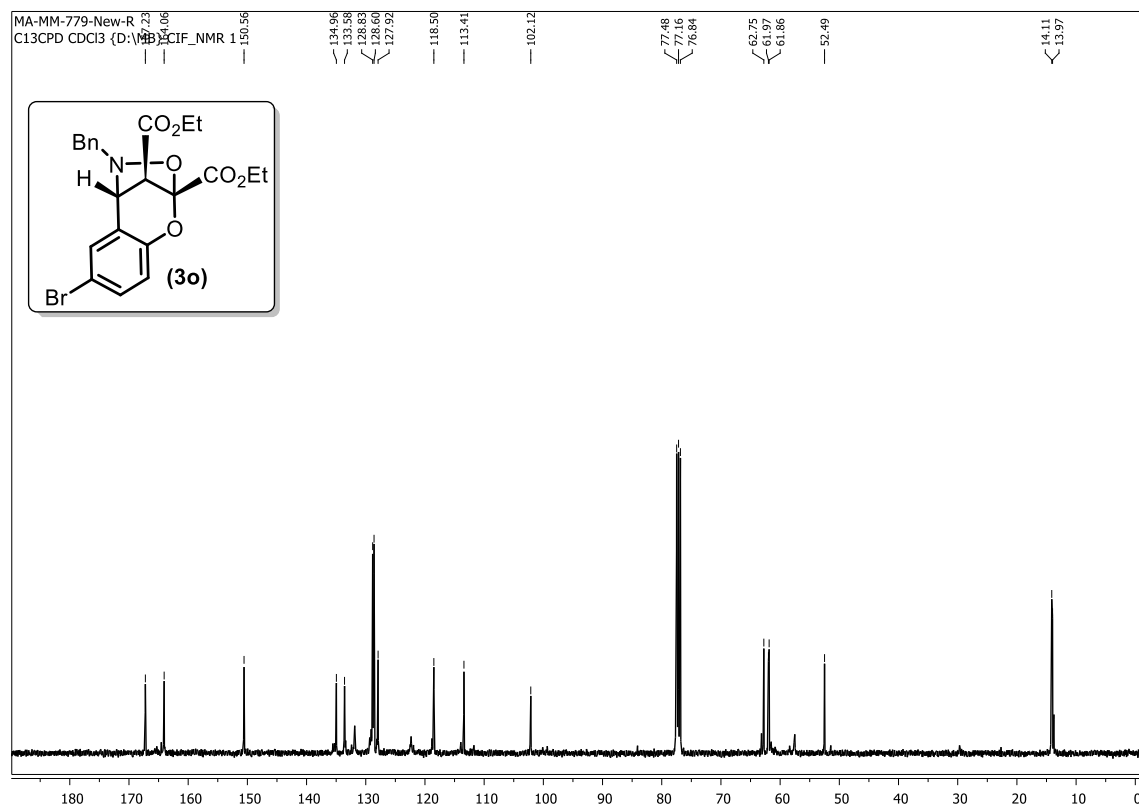



$^1\text{H}$  and  $^{13}\text{C}$  NMR spectrum of compound **3p**

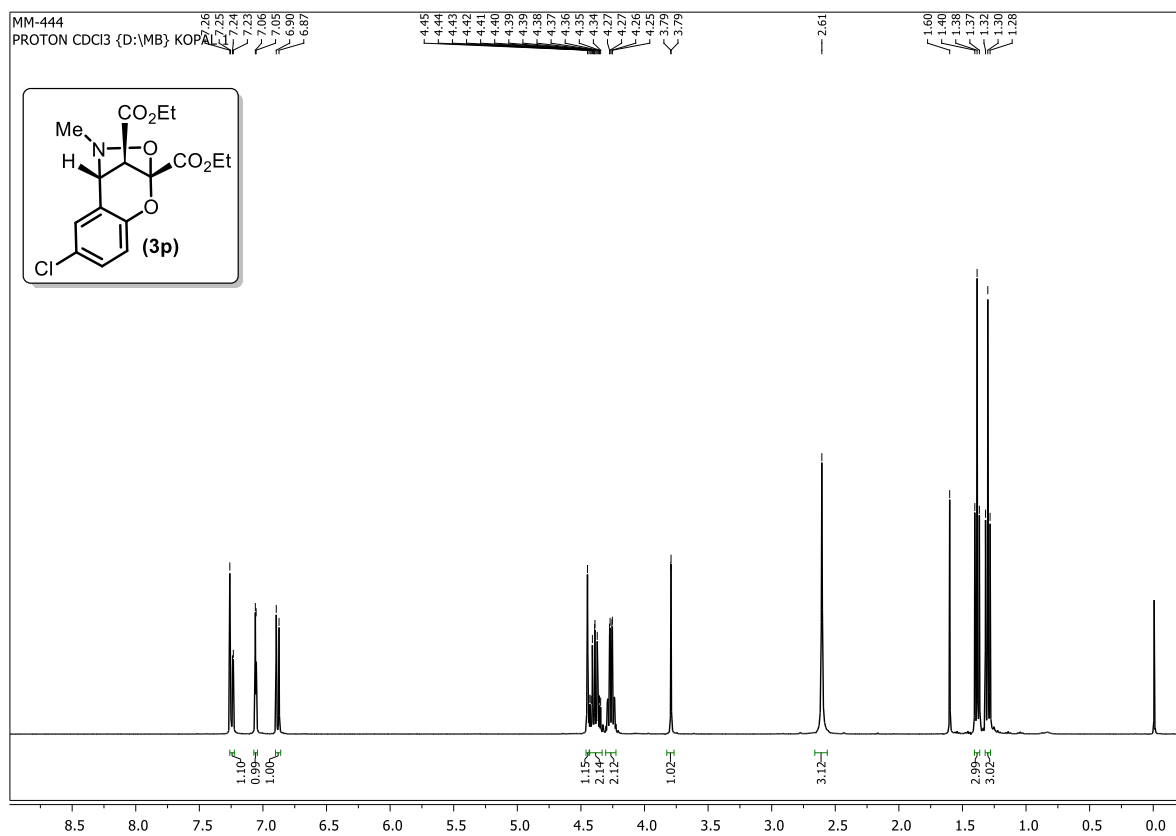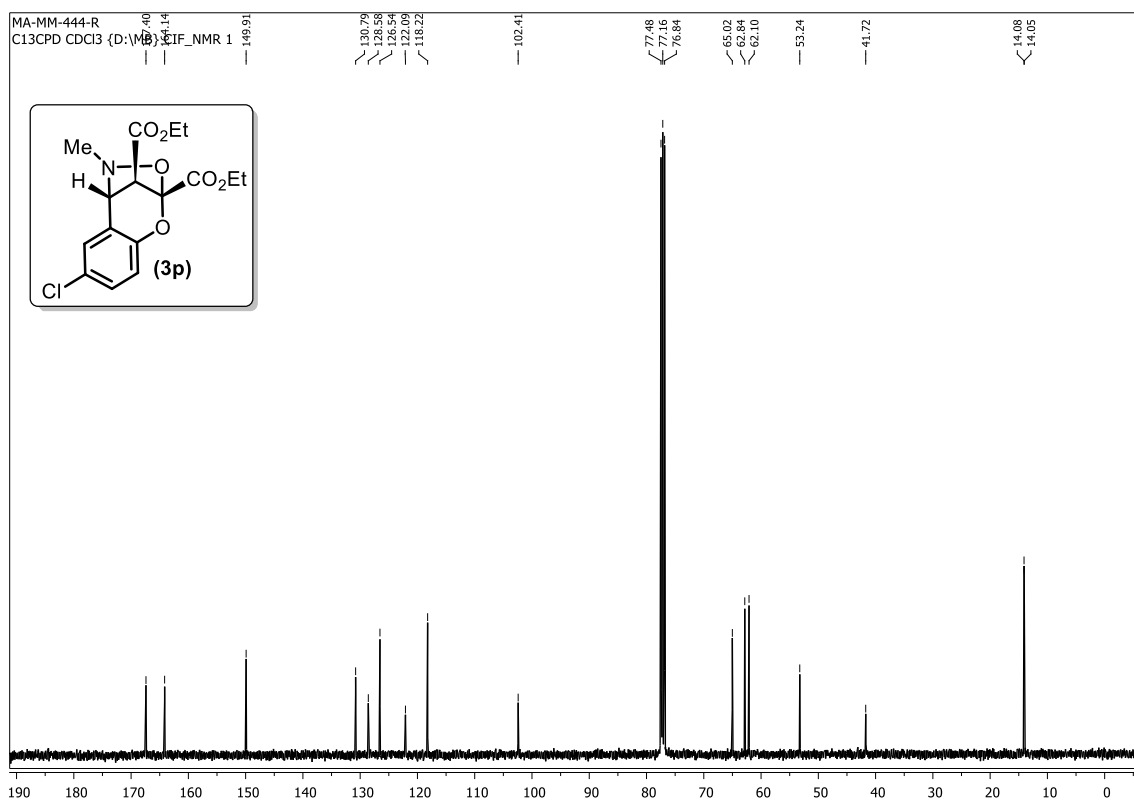

$^1\text{H}$  and  $^{13}\text{C}$  NMR spectrum of compound **3q**

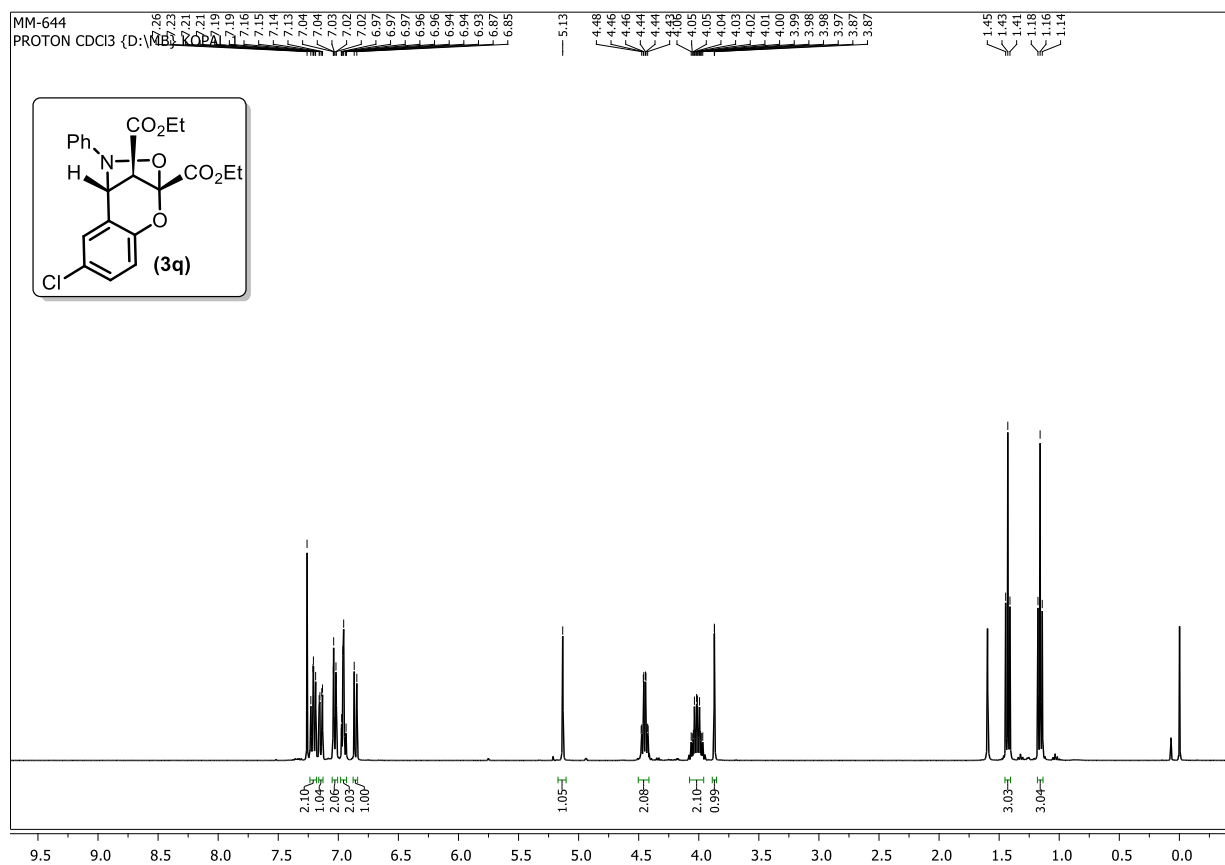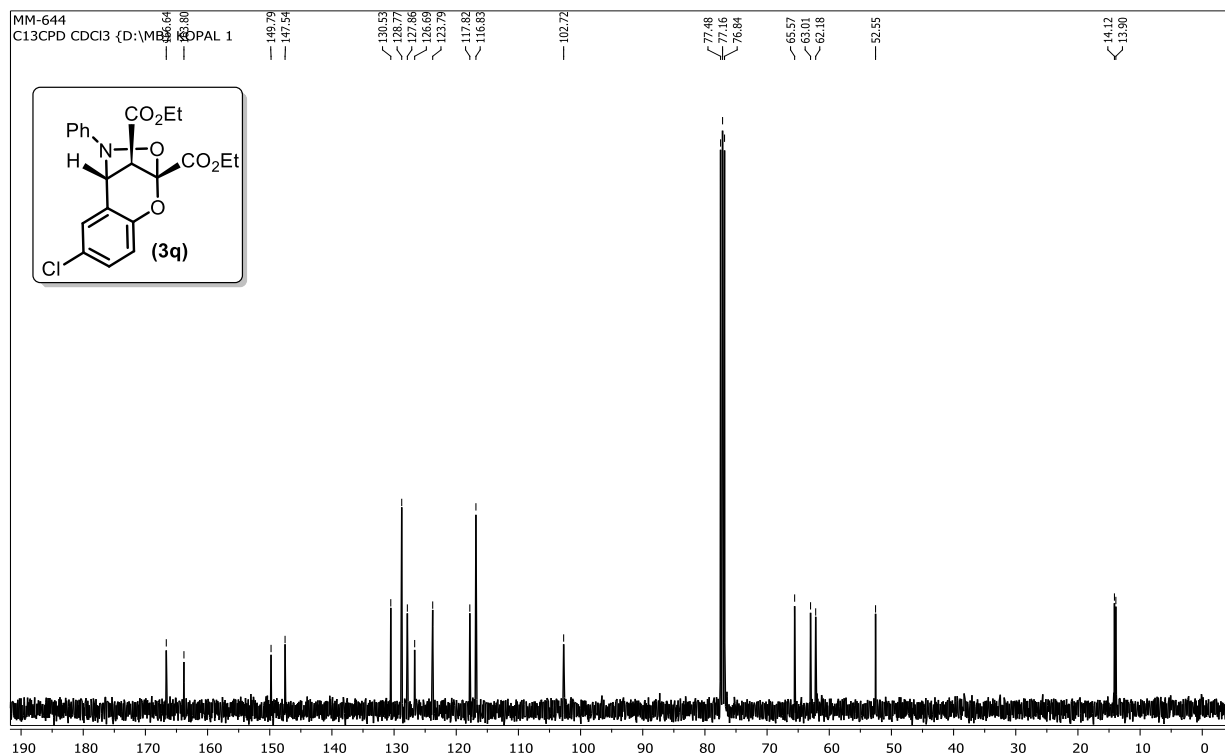

$^1\text{H}$  and  $^{13}\text{C}$  NMR spectrum of compound **3r**

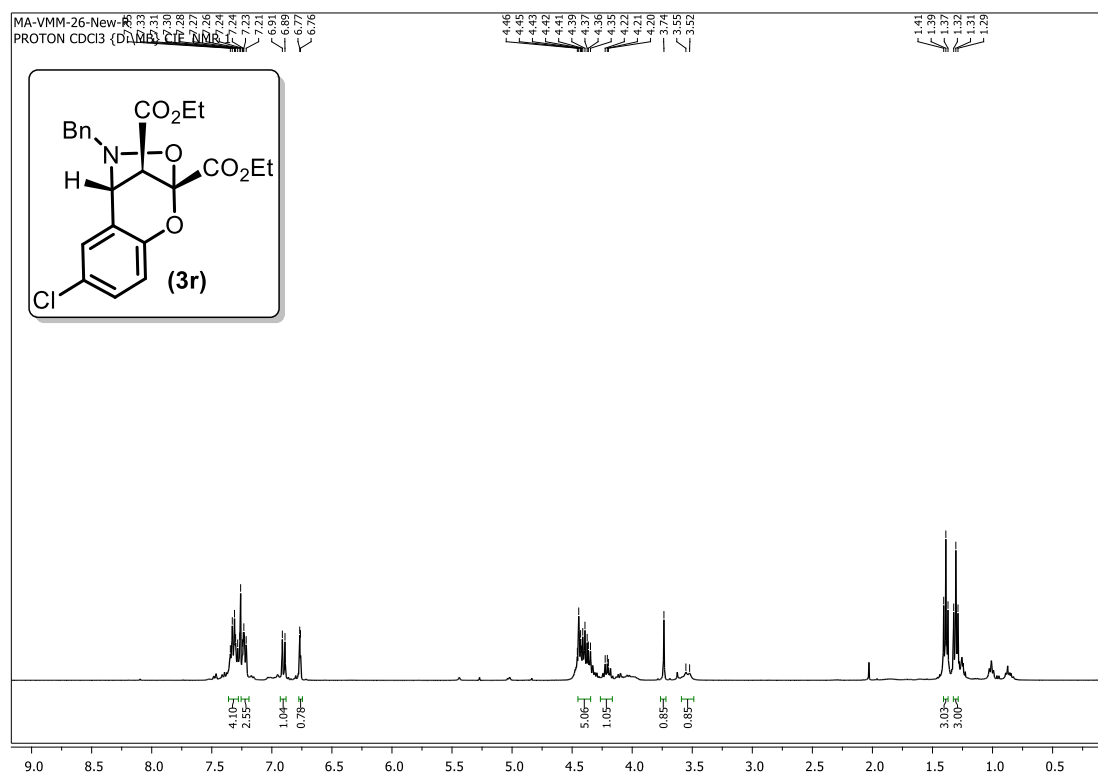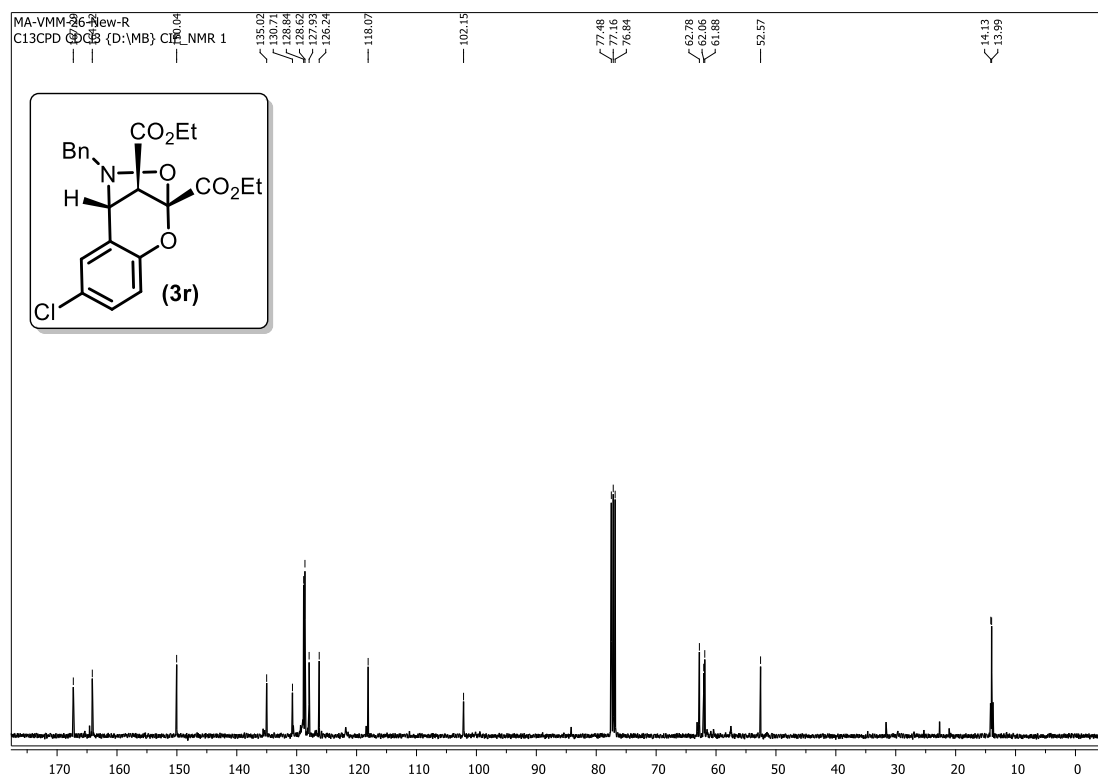

$^1\text{H}$  and  $^{13}\text{C}$  NMR spectrum of compound **3s**

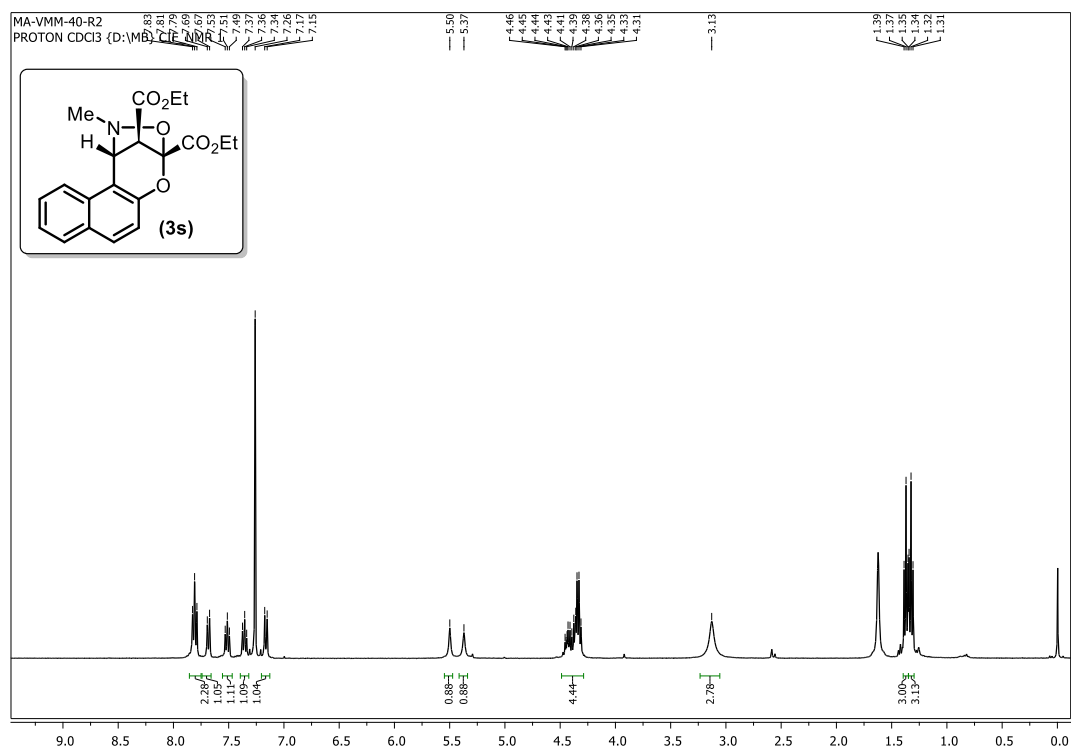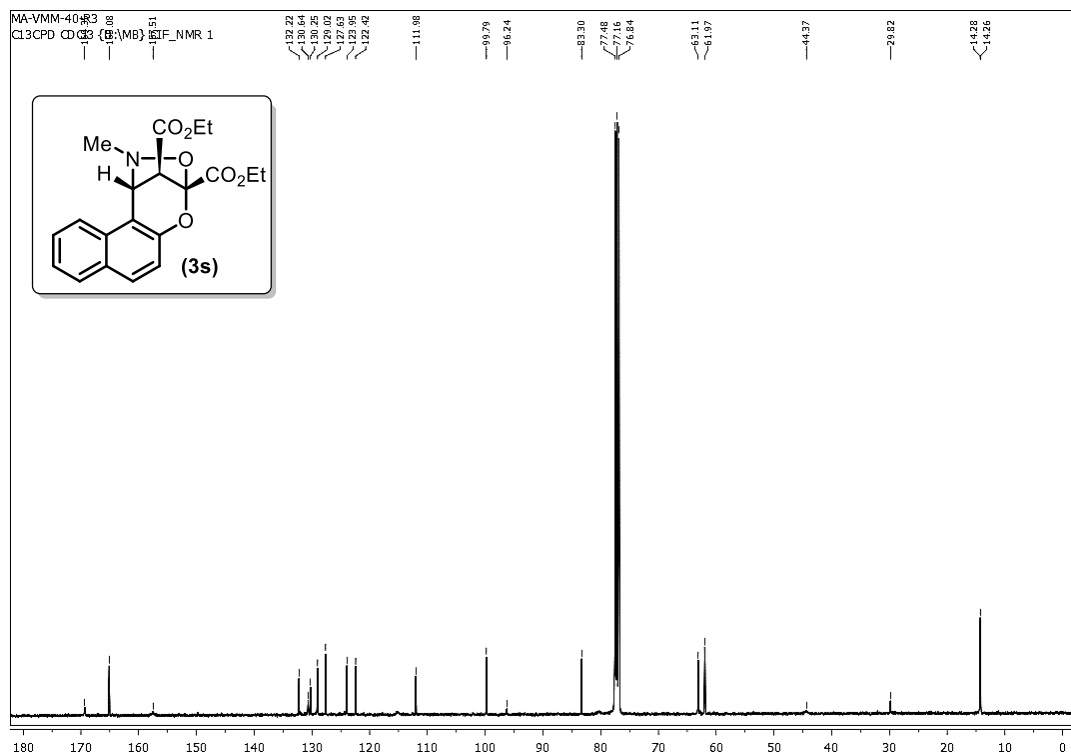

$^1\text{H}$  and  $^{13}\text{C}$  NMR spectrum of compound **3t**

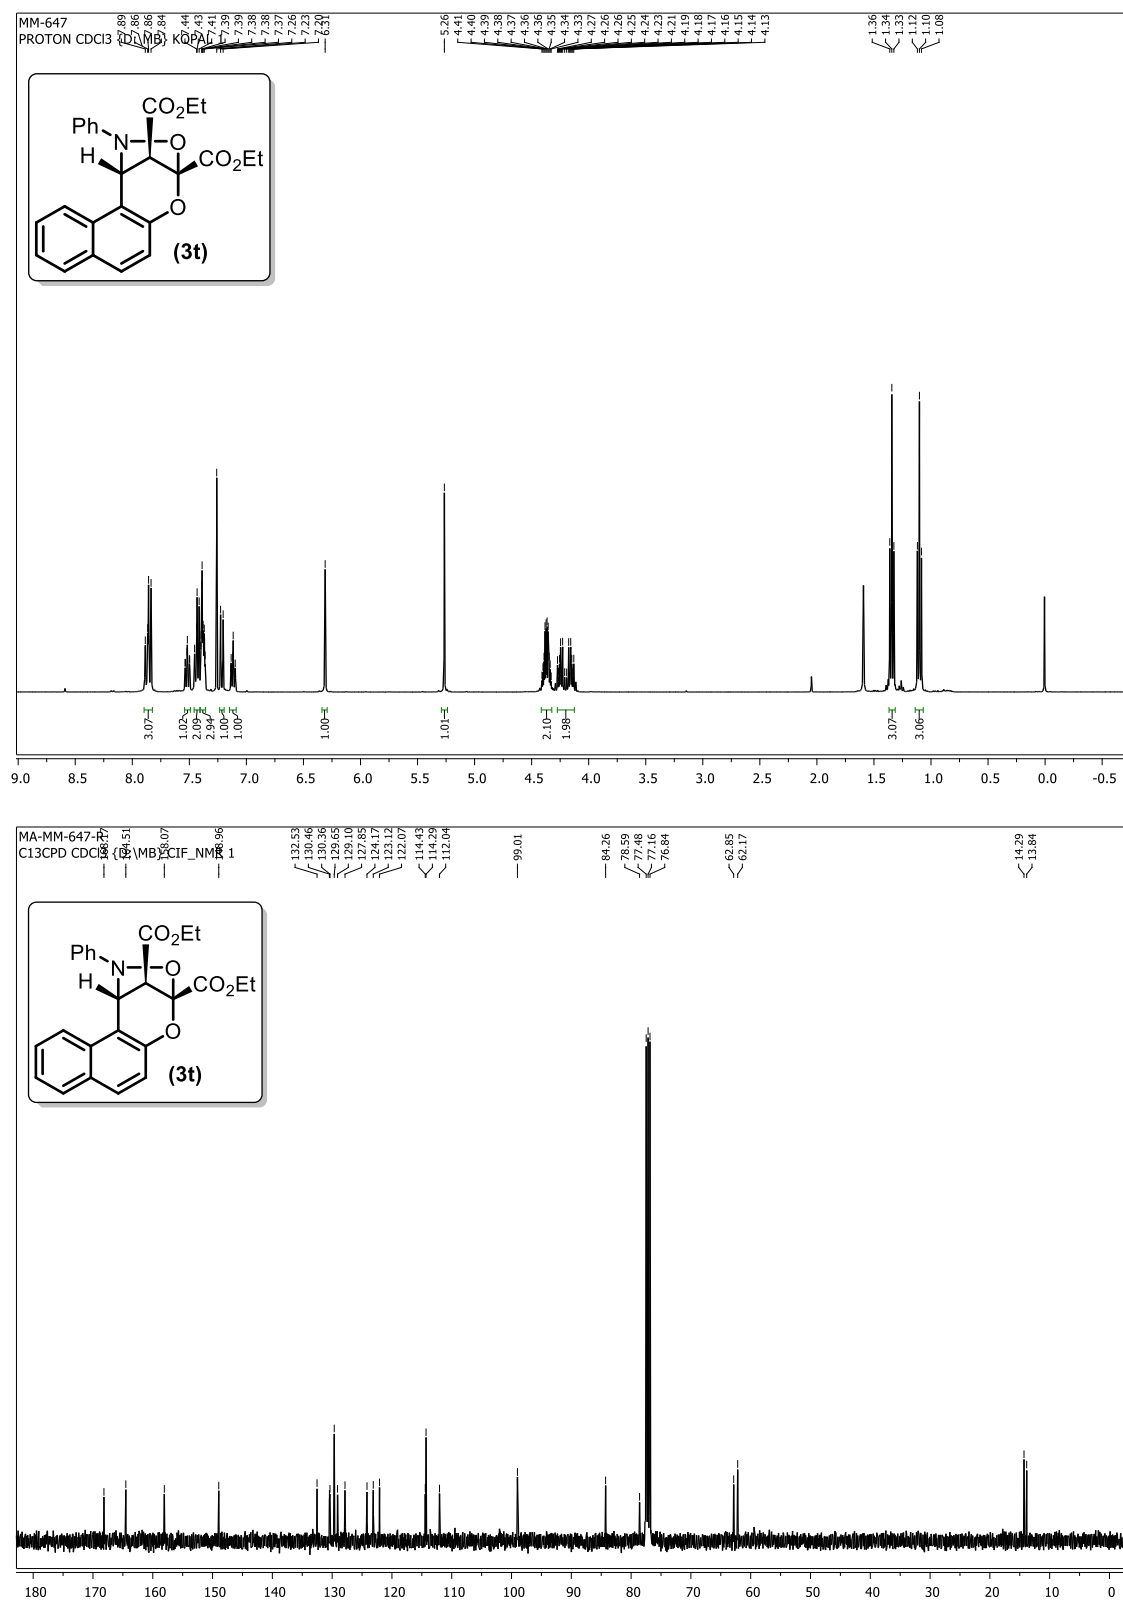

$^1\text{H}$  and  $^{13}\text{C}$  NMR spectrum of compound **3u**

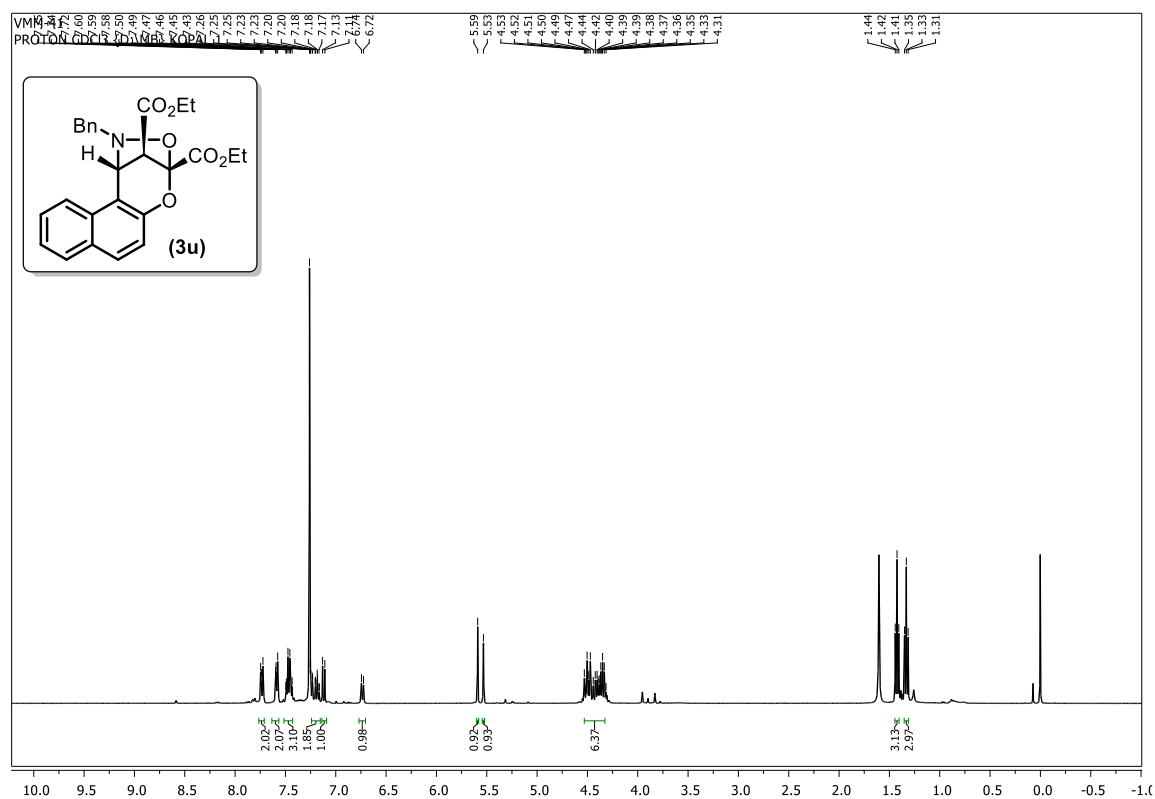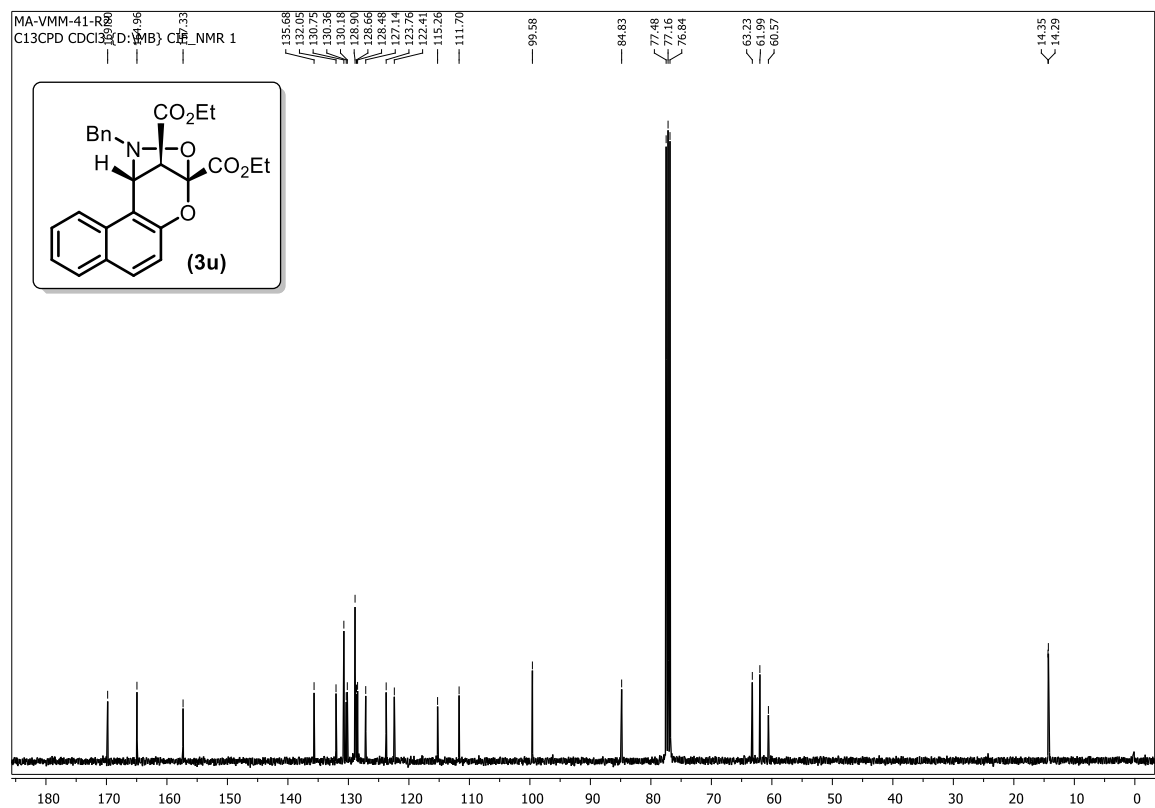

# <sup>1</sup>H and <sup>13</sup>C NMR spectrum of compound **5a**

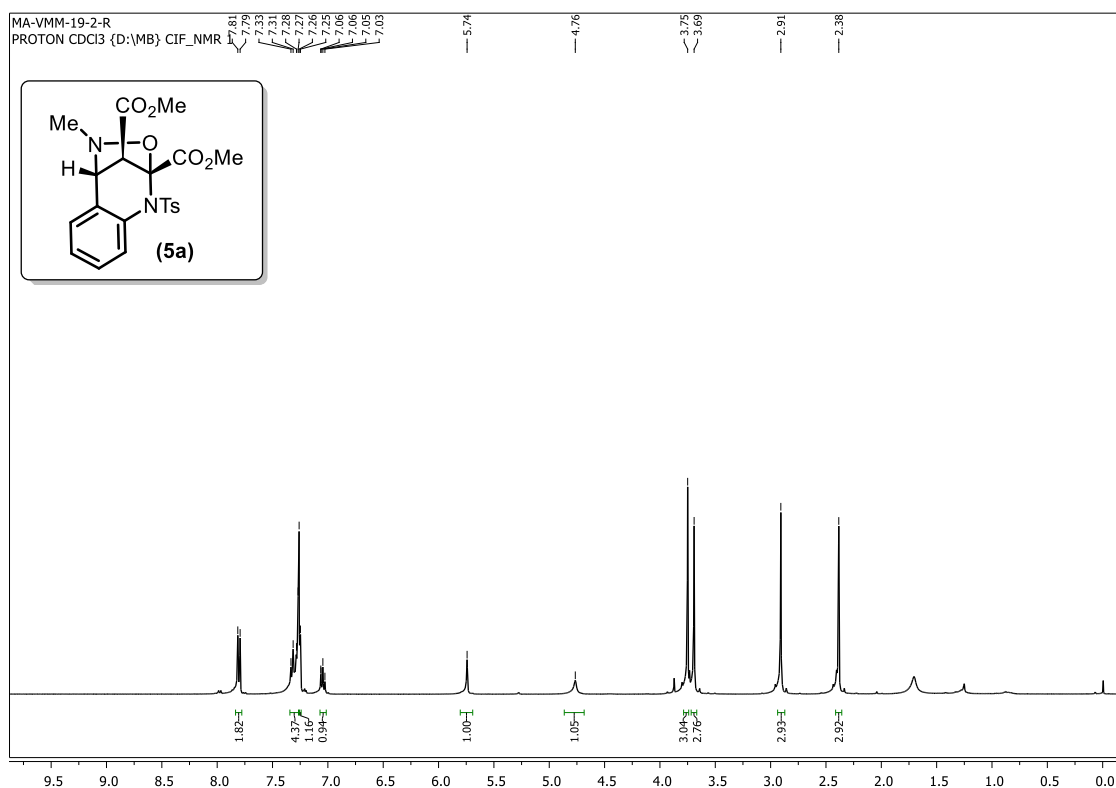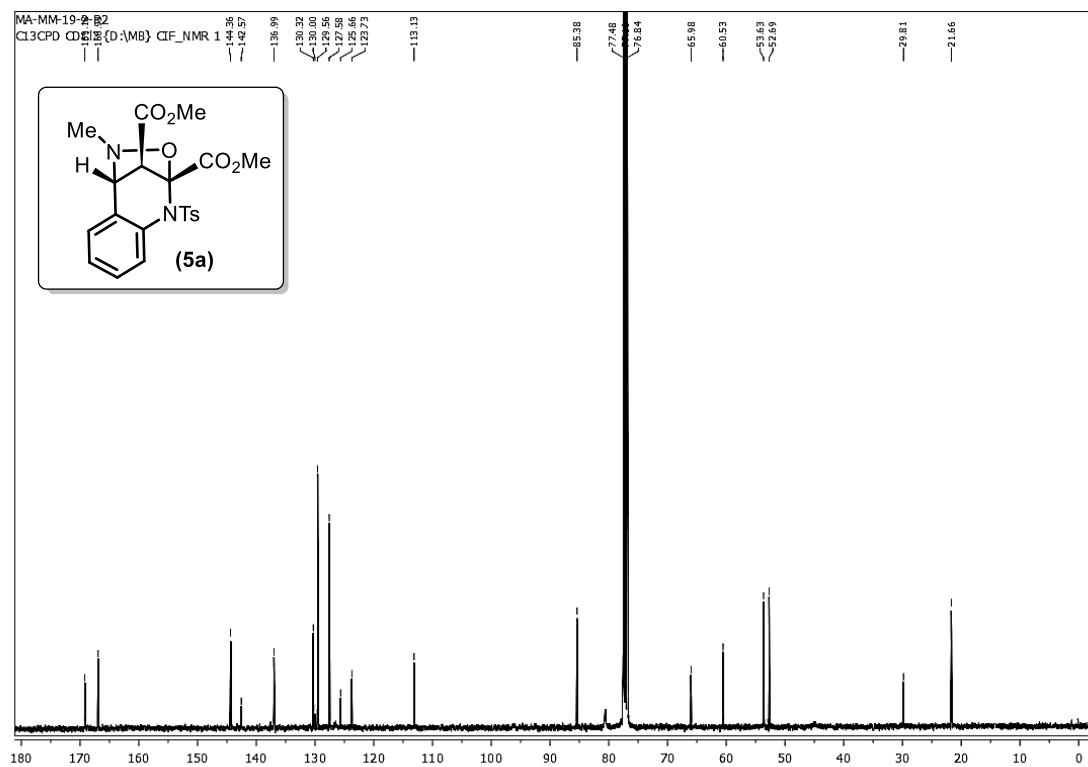

$^1\text{H}$  and  $^{13}\text{C}$  NMR spectrum of compound **5b**

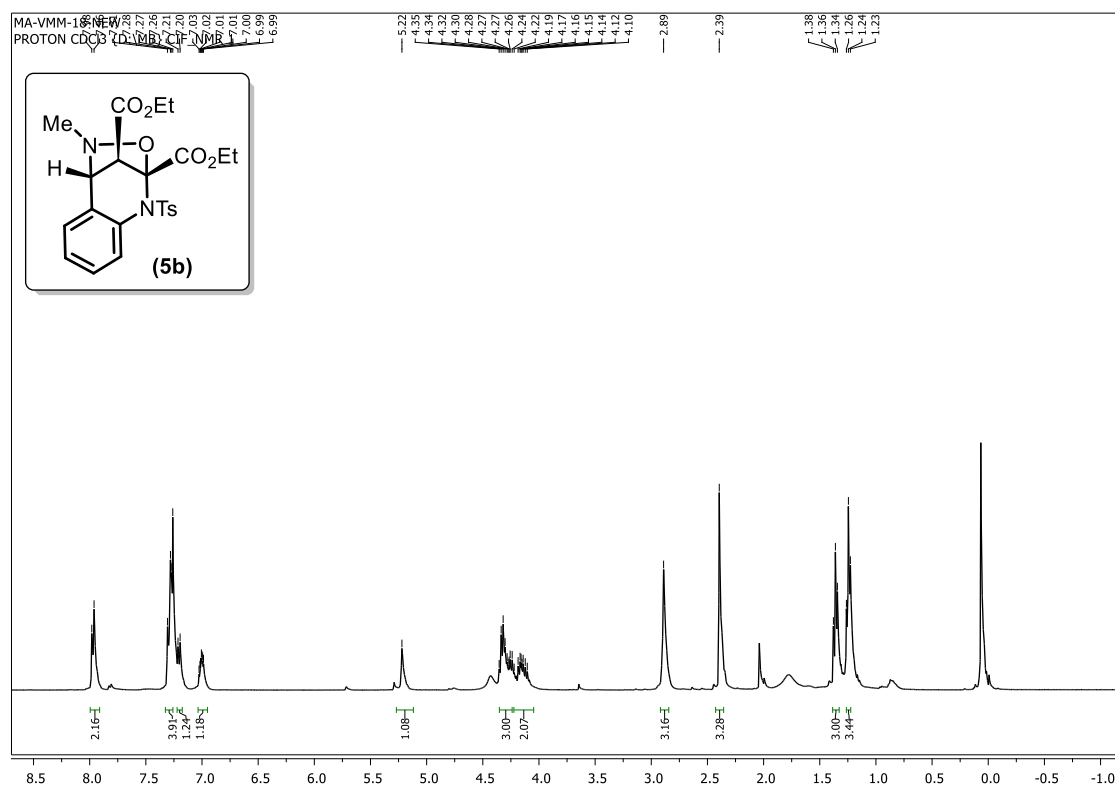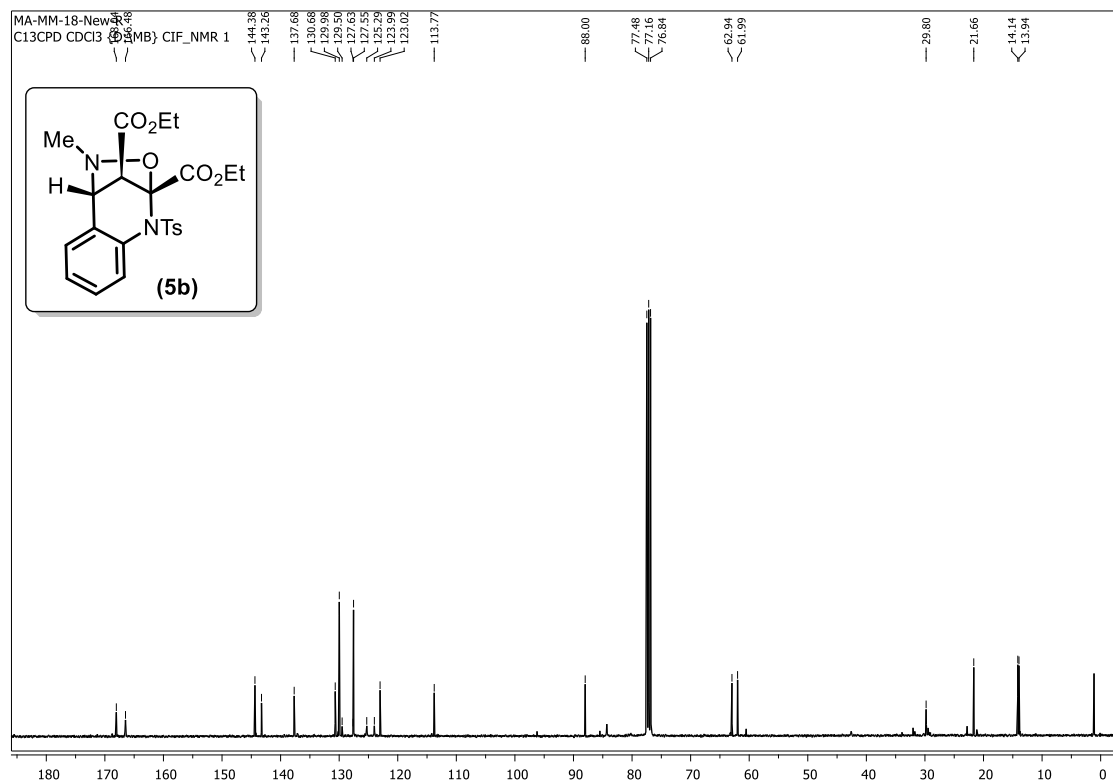



# <sup>1</sup>H and <sup>13</sup>C NMR spectrum of compound 4a

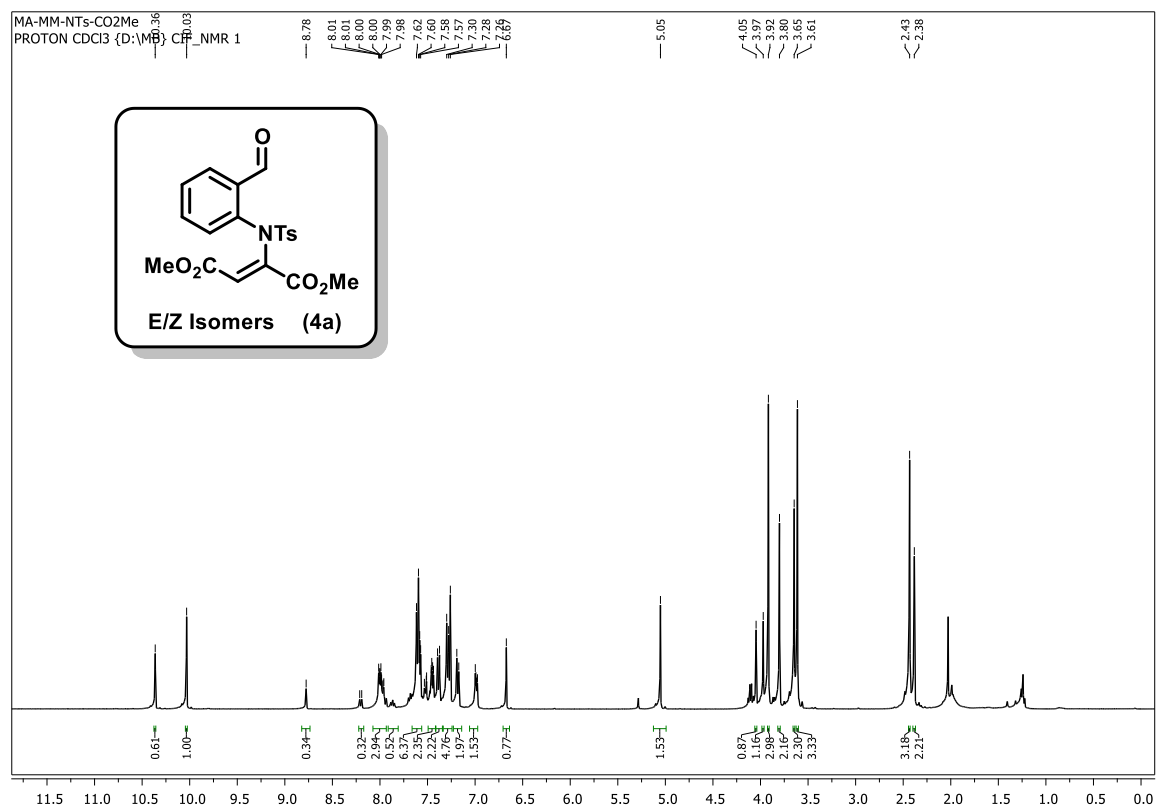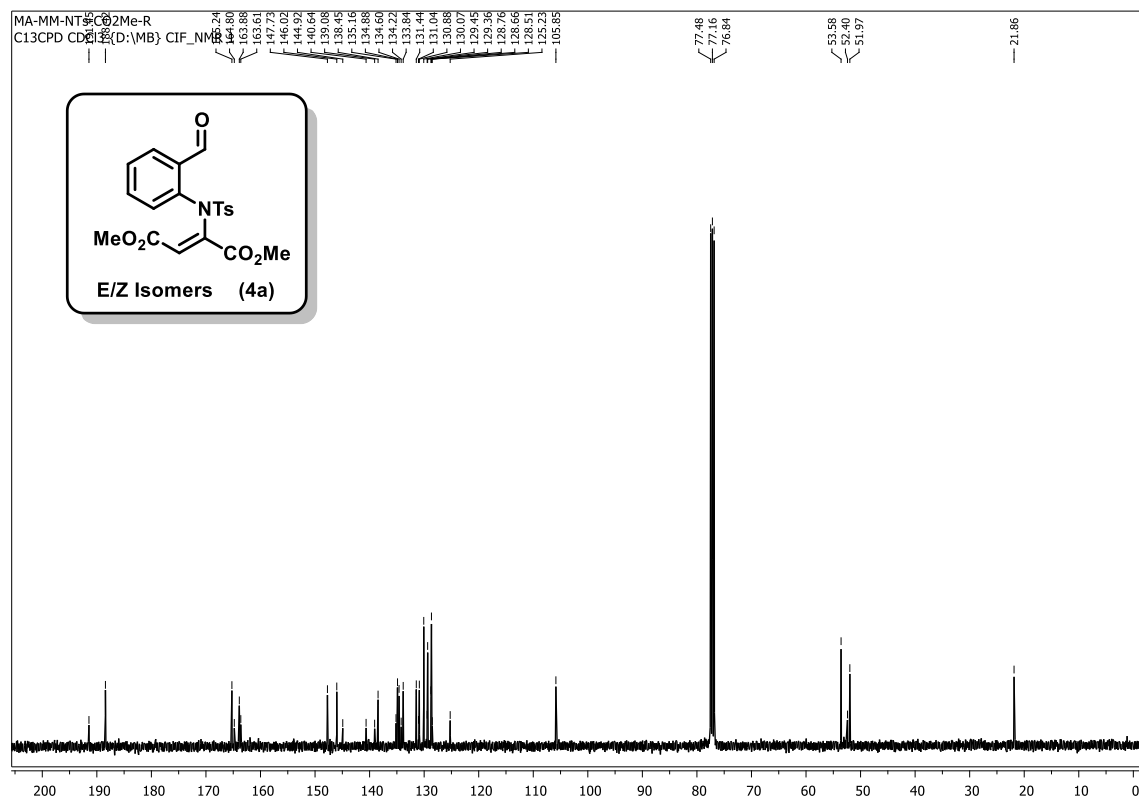

$^1\text{H}$  and  $^{13}\text{C}$  NMR spectrum of compound **4b**

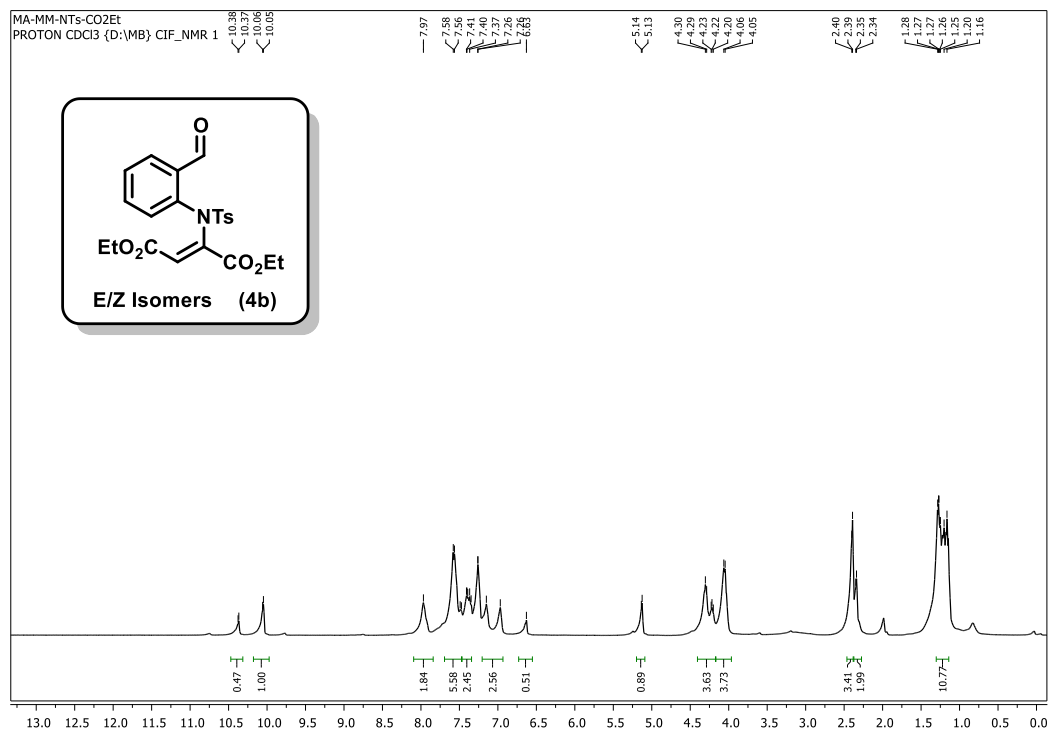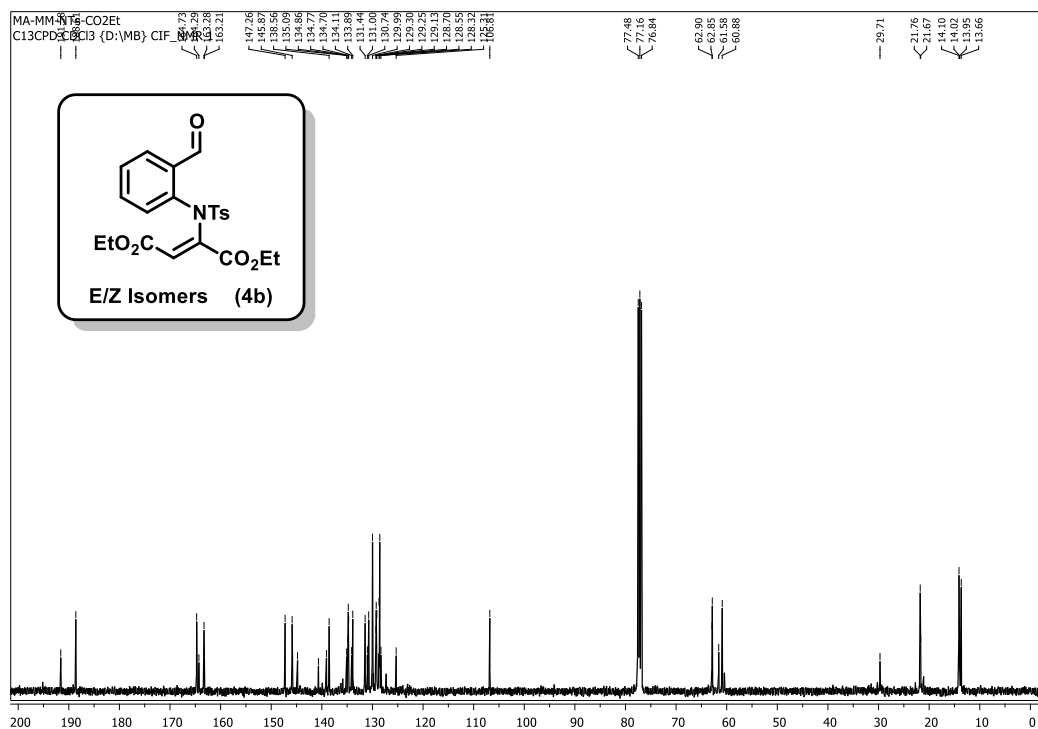

Supplement: d0ob01960g1.pdf [file d0ob01960g1.pdf]
